# Supplementary material for: Tuning the configuration of the flexible metal–alkene-framework affords pure cycloisomers in solid state photodimerization
Source: Royal Society of Chemistry journal article supplement (doi:10.1039/d0cc06939f), 2020-12-18
Supplement: d0cc06939f1.pdf [file d0cc06939f1.pdf]

## Electronic Supplementary Information

### **Tuning the configuration of the flexible metal-alkene-framework affords pure cycloisomers in solid state photodimerization†**

Yong Wang,<sup>‡a</sup> Meng-Fan Wang,<sup>‡a,b</sup> David James Young, Hua Zhu,<sup>b</sup> Fei-Long Hu,<sup>\*a</sup> Yan Mi,<sup>a</sup> Zhen

Qin,<sup>a</sup> Shu Li Chen,<sup>a</sup> Jian-Ping Lang<sup>\*b</sup>

<sup>a</sup> Guangxi Key Laboratory of Chemistry and Engineering of Forest Products, Guangxi University for Nationalities, Nanning, 530006, People's Republic of China.

<sup>b</sup> College of Chemistry, Chemical Engineering and Materials Science, Soochow University, Suzhou 215123, People's Republic of China.

<sup>c</sup> College of Engineering, IT and Environment, Charles Darwin University, Darwin, NT 0909, Australia

† These authors contributed equally to this work and should be considered co-first authors.

## Table of Contents

|                                                                                                                                                                                                   |     |
|---------------------------------------------------------------------------------------------------------------------------------------------------------------------------------------------------|-----|
| General Procedures.....                                                                                                                                                                           | S4  |
| Scheme S1 The carboxylic acids used in this work.....                                                                                                                                             | S5  |
| Experimental.....                                                                                                                                                                                 | S5  |
| Synthesis.....                                                                                                                                                                                    | S5  |
| Synthesis of ligand bpvp.....                                                                                                                                                                     | S5  |
| Synthesis of CP <sub>1</sub> -CP <sub>5</sub> .....                                                                                                                                               | S5  |
| Photo-irradiation experiment.....                                                                                                                                                                 | S8  |
| Separation of Isomer $\alpha$ and Isomer $\beta$ .....                                                                                                                                            | S8  |
| Single Crystal structure determination:.....                                                                                                                                                      | S8  |
| Table S1 Summary of Crystal Data and Structure Refinement Parameters for CP <sub>1</sub> -CP <sub>5</sub> ,<br>Isomer $\alpha$ and Isomer $\beta$ .....                                           | S9  |
| Fig. S1 The <sup>1</sup> H (a), and <sup>13</sup> C (b) NMR spectra of bpvp in CDCl <sub>3</sub> .....                                                                                            | S11 |
| Fig. S2 Thermogravimetric analysis plots of CP <sub>1</sub> (a), CP <sub>2</sub> (b), CP <sub>3</sub> (c), CP <sub>4</sub> (d), CP <sub>5</sub> (e).S14                                           |     |
| Fig. S3 PXRD patterns of CP <sub>1</sub> (a), CP <sub>2</sub> (b), CP <sub>3</sub> (c), CP <sub>4</sub> (d), CP <sub>5</sub> (e).....                                                             | S16 |
| Fig. S4 View of the coordination environments of Cd(II) centers in CP <sub>1</sub> .....                                                                                                          | S17 |
| Fig. S5 The adjacent zigzag chains are connected to form a 2D network.....                                                                                                                        | S17 |
| Fig. S6 View of the 2D network showing hexagonal windows.....                                                                                                                                     | S17 |
| Fig. S7 Cartoon showing the 2D network in CP <sub>1</sub> -CP <sub>3</sub> .....                                                                                                                  | S18 |
| Fig. S8 (a) 3D polypseudo-threading network; (b) A schematic illustration of three<br>adjacent 2D layers; (c) A schematic illustration of the mutual polypseudo-threading of<br>three layers..... | S19 |
| Fig. S9 Fourteen L <sub>2</sub> (or HL <sub>2</sub> ) molecules were embedded in the hexagonal window in<br>CP <sub>2</sub> .....                                                                 | S19 |
| Fig. S10 View of the 1D chain structures of CP <sub>4</sub> (a) and CP <sub>5</sub> (b).....                                                                                                      | S20 |

|                                                                                                                                                                                                                                                                |            |
|----------------------------------------------------------------------------------------------------------------------------------------------------------------------------------------------------------------------------------------------------------------|------------|
| <b>Fig. S11 View of the distances between each pair of C=C in CP<sub>4</sub> (a) and CP<sub>5</sub> (b), showing the face-to-face alignment of each bpvp pair in CP<sub>4</sub> and CP<sub>5</sub>.....</b>                                                    | <b>S21</b> |
| <b>Fig. S12 (a) The <sup>1</sup>H NMR spectrum of CP<sub>1</sub>; (b) The <sup>1</sup>H NMR spectrum of CP<sub>1</sub>' (DMSO-<i>d</i><sub>6</sub>).....</b>                                                                                                   | <b>S22</b> |
| <b>Fig. S13 (a) The <sup>1</sup>H NMR spectrum of CP<sub>2</sub>; (b) The <sup>1</sup>H NMR spectrum of CP<sub>2</sub>' (DMSO-<i>d</i><sub>6</sub>).....</b>                                                                                                   | <b>S23</b> |
| <b>Fig. S14 (a) The <sup>1</sup>H NMR spectrum of CP<sub>3</sub>; (b) The <sup>1</sup>H NMR spectrum of CP<sub>3</sub>' (DMSO-<i>d</i><sub>6</sub>).....</b>                                                                                                   | <b>S24</b> |
| <b>Fig. S15 (a) The <sup>1</sup>H NMR spectrum of CP<sub>4</sub>; (b) The <sup>1</sup>H NMR spectrum of CP<sub>4</sub>' (DMSO-<i>d</i><sub>6</sub>).....</b>                                                                                                   | <b>S25</b> |
| <b>Fig. S16 (a) The <sup>1</sup>H NMR spectrum of CP<sub>5</sub>; (b) The <sup>1</sup>H NMR spectrum of CP<sub>5</sub>' (DMSO-<i>d</i><sub>6</sub>).....</b>                                                                                                   | <b>S26</b> |
| <b>Fig. S17 The CPMAS <sup>13</sup>C NMR spectra of CP<sub>1</sub> to CP<sub>1</sub>' (a), CP<sub>2</sub> to CP<sub>2</sub>' (b), CP<sub>3</sub> to CP<sub>3</sub>' (c), CP<sub>4</sub> to CP<sub>4</sub>' (d), CP<sub>5</sub> to CP<sub>5</sub>' (e).....</b> | <b>S29</b> |
| <b>Fig. S18 The crystal structure of Isomer <math>\alpha</math>.....</b>                                                                                                                                                                                       | <b>S29</b> |
| <b>Fig. S19 The <sup>1</sup>H (a), <sup>13</sup>C (b), H-H COSY (c), HSQC (d), HMBC (e), NOESY (f) NMR spectra of Isomer <math>\alpha</math> in CDCl<sub>3</sub>.....</b>                                                                                      | <b>S32</b> |
| <b>Fig. S20 The mass spectrum of Isomer <math>\alpha</math>.....</b>                                                                                                                                                                                           | <b>S33</b> |
| <b>Fig. S21 The crystal structure of Isomer <math>\beta</math>.....</b>                                                                                                                                                                                        | <b>S33</b> |
| <b>Fig. S22 The <sup>1</sup>H (a), <sup>13</sup>C (b), H-H COSY (c), HSQC (d), HMBC (e), NOESY (f) NMR spectra of Isomer <math>\beta</math> in CDCl<sub>3</sub>.....</b>                                                                                       | <b>S36</b> |
| <b>Fig. S23 The mass spectrum of Isomer <math>\beta</math>.....</b>                                                                                                                                                                                            | <b>S37</b> |
| <b>Table S2 A summary of isomer ratios, number of guest molecules, dimensions of framework structures and dimensions of guest molecules in CP<sub>1</sub>-CP<sub>3</sub>.....</b>                                                                              | <b>S37</b> |
| <b>Table S3 The relative Gibbs free energies (kcal/mol) for Isomer <math>\alpha</math> and Isomer <math>\beta</math>.....</b>                                                                                                                                  | <b>S37</b> |
| <b>Fig. S24 Photograph of filter papers impregnated with solution of CP<sub>1</sub>-CP<sub>5</sub> and CP<sub>1</sub>'-CP<sub>5</sub>' in DMF (365 nm).....</b>                                                                                                | <b>S38</b> |
| <b>References.....</b>                                                                                                                                                                                                                                         | <b>S38</b> |

## **General Procedures.**

The ligand 3,5-bis-(2-(pyridin-4-yl)vinyl)pyridine (bpvp) was prepared according to literature methods<sup>1</sup>. Other reagents were obtained commercially and used without further purification. Powder X-ray diffraction (PXRD) patterns were acquired on a PANalytical X'Pert PRO MPD system (PW3040/60) using Cu K $\alpha$  radiation ( $\lambda = 1.5406\text{\AA}$ ) from 5° to 50° with a scanning step size of 0.02°. Single-crystal X-ray diffraction data for **CP<sub>1</sub>**, **CP<sub>2</sub>**, **CP<sub>3</sub>**, **CP<sub>4</sub>** and **CP<sub>5</sub>** were recorded on a Bruker Smart CCD diffractometer or Agilent Xcalibur E. <sup>1</sup>H NMR chemical shifts were referenced to the solvent signal in CDCl<sub>3</sub> or DMSO-*d*<sub>6</sub>. <sup>13</sup>C-NMR spectra were recorded at a resonance frequency of 101.6 MHz on a Bruker AVANCE 400M spectrometer. Cross-polarization magic angle spinning (CPMAS) <sup>13</sup>C NMR spectra were recorded at a resonance frequency of 101.6 MHz on a BRUKER ADVANCE DSX 400 MHz spectrometer at ambient temperature. IR spectra were recorded on a Varian 1000 FT-IR spectrometer (4000-400 cm<sup>-1</sup>). Elemental analyses (C, H, N) were performed using a PE 2400 II elemental analyzer. The mass spectra were recorded at Bruker micrOTOF-Q III mass spectrometer. Thermogravimetric analyses (TGA) were performed on a Mettler Toledo Star System under a nitrogen atmosphere at a heating rate of 10°C/min. Photo-irradiation experiments were conducted with a high-pressure mercury lamp at a wavelength of 365 nm. The fluorescence spectra were acquired on a JASCO FP-6500 fluorescence spectrophotometer with powdered samples.

## **Computational studies**

All calculations were performed using Gaussian 09.<sup>2</sup> The geometry optimizations

were optimized using B3LYP functional<sup>3</sup> with the triple zeta basis set 6-311++G(d,p).<sup>4</sup> No symmetry constraints were imposed. Analytical frequencies were calculated to verify the nature of all stationary points as minima.

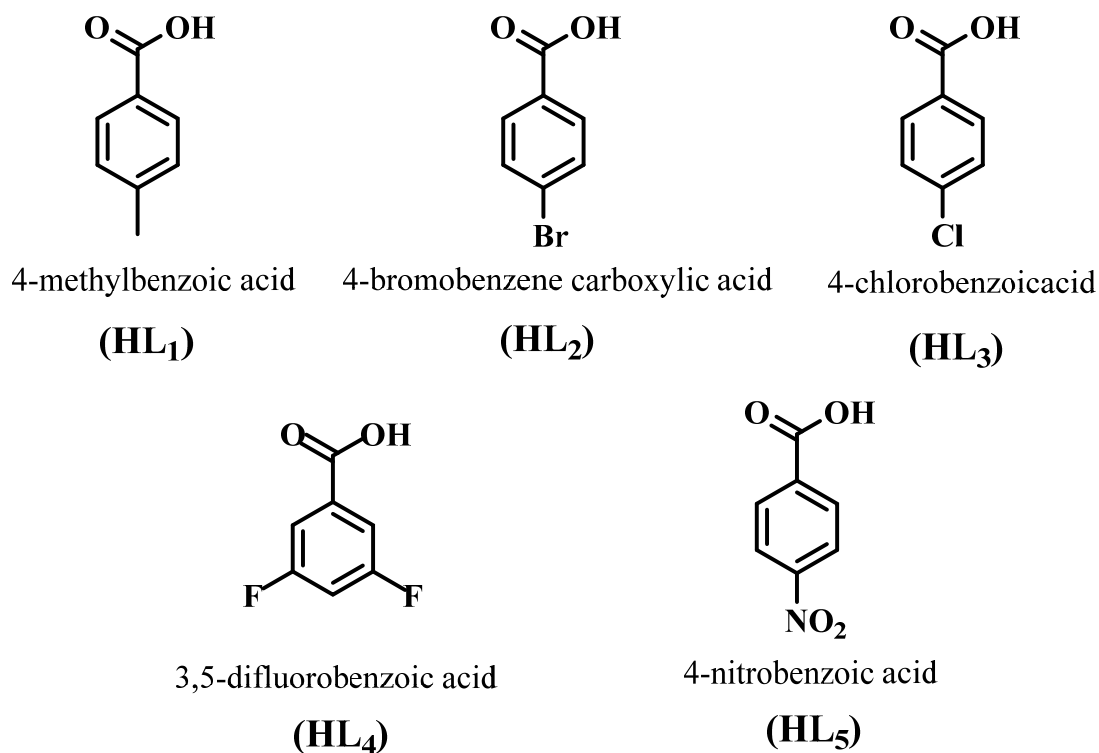

**Scheme S1** The carboxylic acids used in this work.

## Experimental

### Synthesis

**Synthesis of ligand bpvp:** <sup>1</sup>H NMR (400 MHz, CDCl<sub>3</sub>, ppm): δ 8.69 (d, 2H, Ph-H), 8.63 (d, 4H, Py-H), 8.00 (s, 1H, Ph-H), 7.41 (d, 4H, Py-H), 7.33 and 7.17 (d, 4H, CH=CH). <sup>13</sup>C NMR (100 MHz, CDCl<sub>3</sub>, ppm): δ 150.50, 148.59, 143.77, 132.04, 130.44, 129.08, 128.89, 121.05 (**Fig. S1**).

### Synthesis of CP<sub>1</sub>-CP<sub>5</sub>

**Preparation of [Cd<sub>3</sub>(bpvp)<sub>2</sub>(L<sub>1</sub>)<sub>6</sub>]·0.5HL<sub>1</sub>·H<sub>2</sub>O (CP<sub>1</sub>):** Bpvp (6 mg, 0.021 mmol), CdSO<sub>4</sub>·8/3H<sub>2</sub>O (26.0 mg, 0.101 mmol) and HL<sub>1</sub> (13.6 mg, 0.010 mmol) were placed

in a thick Pyrex test tube. To this mixture was added 2 mL of solvent (DMF / H<sub>2</sub>O = 1:2) and one drop of concentrated nitric acid. The tube was then sealed and heated at 140 °C for 10 hours. Cooling to room temperature resulted in yellow crystals of **CP<sub>1</sub>**, that were washed with EtOH and H<sub>2</sub>O and dried in air. Yield: 80% based on bpvp. mp. 299.1 °C - 302.2 °C. Anal. calcd for C<sub>90</sub>H<sub>78</sub>Cd<sub>3</sub>N<sub>6</sub>O<sub>14</sub>: C, 59.89; H, 4.36; N, 4.66; found: C, 59.72; H, 4.39; N, 4.71. IR (KBr, cm<sup>-1</sup>): 3436m, 30354m, 2919m, 1932w, 1704w, 1608s, 1531s, 1400s, 1288w, 1222w, 1176s, 1106w, 1068w, 1018s, 767s, 620m, 555m, 420m. <sup>1</sup>H NMR (400 MHz, DMSO-*d*<sub>6</sub>, ppm): δ (bpvp) 8.76 (d, 4H, Ph-H), 8.63 (d, 8H, Py-H), 8.47 (s, 2H, Ph-H), 7.62 (d, 8H, Py-H), 7.66 and 7.53 (d, 8H, CH=CH); δ (L<sub>1</sub>) 7.87 (d, 8H, Ph-H), 7.23 (d, 8H, Ph-H), 2.34 (s, 12, CH<sub>3</sub>) (**Fig. S12a**).

**Preparation of [Cd<sub>3</sub>(bpvp)<sub>2</sub>(L<sub>2</sub>)<sub>6</sub>]·HL<sub>2</sub>·2H<sub>2</sub>O (CP<sub>2</sub>):** CP<sub>2</sub> (yellow) was prepared in a similar manner to that of CP<sub>1</sub>, but HL<sub>2</sub> (12.0 mg, 0.060 mmol) was used instead of HL<sub>1</sub>. Yield: 75% based on bpvp. mp. 313.1 °C-314.5 °C. Anal. calcd for C<sub>87</sub>H<sub>59</sub>Br<sub>7</sub>Cd<sub>3</sub>N<sub>6</sub>O<sub>16</sub>: C, 44.64; H, 2.54; N, 3.59; found: C, 44.60; H, 2.43; N, 3.61. IR (KBr, cm<sup>-1</sup>): 3428m, 3054w, 1928w, 1704w, 1670w, 1596s, 1535s, 1403s, 1276w, 1226w, 1168m, 1141s, 1068s, 1010s, 971m, 852s, 802m, 771s, 690m, 663w, 560m, 532m. <sup>1</sup>H NMR (400 MHz, DMSO-*d*<sub>6</sub>, ppm): δ (bpvp) 8.76 (d, 4H, Ph-H), 8.62 (d, 8H, Py-H), 8.46 (s, 2H, Ph-H), 7.62 (d, 8H, Py-H), 7.66 and 7.53 (d, 8H, CH=CH); δ (L<sub>2</sub>) 7.96 (d, 8H, Ph-H), 7.49 (d, 8H, Ph-H) (**Fig. S13a**).

**Preparation of [Cd<sub>3</sub>(bpvp)<sub>2</sub>(L<sub>3</sub>)<sub>6</sub>]·HL<sub>3</sub>·CH<sub>3</sub>OH (CP<sub>3</sub>):** CP<sub>3</sub> (yellow) was obtained in a similar manner to that of CP<sub>1</sub>, but HL<sub>3</sub> (11.0 mg, 0.071 mmol) was used instead

of HL<sub>1</sub>. Yield: 90% based on bpvp. mp. 313.5°C-316.1°C. Anal. calcd for C<sub>88</sub>H<sub>63</sub>Cd<sub>3</sub>C<sub>17</sub>N<sub>6</sub>O<sub>15</sub>: C, 52.07; H, 3.13; N, 4.14; found: C, 52.12; H, 3.06; N, 4.21. IR (KBr, cm<sup>-1</sup>): 3440m, 3066w, 1589s, 1542s, 1396s, 1276w, 1222w, 1168w, 1095s, 1014s, 968m, 852s, 775s, 690m, 536s, 470w. <sup>1</sup>H NMR (400 MHz, DMSO-*d*<sub>6</sub>, ppm): δ (bpvp) 8.76 (d, 4H, Ph-H), 8.62 (d, 8H, Py-H), 8.46 (s, 2H, Ph-H), 7.62 (d, 8H, Py-H), 7.66 and 7.53 (d, 8H, CH=CH); δ (HL<sub>3</sub>) 7.96 (d, 8H, Ph-H), 7.49 (d, 8H, Ph-H) (**Fig. S14a**).

**Preparation of [Cd<sub>2</sub>(bpvp)<sub>2</sub>(L<sub>4</sub>)<sub>4</sub>] (CP<sub>4</sub>):** CP<sub>4</sub> (yellow) was obtained in a similar manner to that of CP<sub>1</sub>, but HL<sub>4</sub> (13.4 mg, 0.085 mmol) was used to instead of HL<sub>1</sub>. Yield: 75.3% based on bpvp. mp. 318.3°C-321.7°C. Anal. calcd for C<sub>66</sub>H<sub>42</sub>Cd<sub>2</sub>F<sub>8</sub>N<sub>6</sub>O<sub>8</sub>: C, 55.67; H, 2.97; N, 5.90; found: C, 55.61; H, 3.02; N, 5.95. IR (KBr, cm<sup>-1</sup>): 3434m, 1612s, 1558s, 1469m, 1434s, 1388s, 1295m, 1222m, 1118s, 894m, 859s, 806m, 775s, 698m, 667m, 559m, 532m. <sup>1</sup>H NMR (400 MHz, DMSO-*d*<sub>6</sub>, ppm): δ (bpvp) 8.76 (d, 4H, Ph-H), 8.62 (d, 8H, Py-H), 8.46 (s, 2H, Ph-H), 7.61 (d, 8H, Py-H), 7.66 and 7.52 (d, 8H, CH=CH); δ (HL<sub>4</sub>) 7.54 (m, 8H, Ph-H), 7.37 (m, 4H, Ph-H) (**Fig. S15a**).

**Preparation of [Cd<sub>3</sub>(bpvp)<sub>3</sub>(L<sub>5</sub>)<sub>6</sub>(H<sub>2</sub>O)] (CP<sub>5</sub>):** CP<sub>5</sub> (red) was obtained in a similar manner to that of CP<sub>1</sub>, but HL<sub>5</sub> (12.0 mg, 0.072 mmol) was used instead of HL<sub>1</sub>. Yield: 85% based on bpvp. mp. 311.4°C-313.2 °C. Anal. calcd for C<sub>99</sub>H<sub>71</sub>Cd<sub>3</sub>N<sub>15</sub>O<sub>25</sub>: C, 53.85; H, 3.24; N, 9.52; found: C, 53.94; H, 3.18; N, 9.48. IR (KBr, cm<sup>-1</sup>): 3452w, 3074w, 1614s, 1515s, 1403s, 1346s, 1222w, 1106m, 1014s, 971s, 836s, 725s, 618m, 559m, 520s. <sup>1</sup>H NMR (400 MHz, DMSO-*d*<sub>6</sub>, ppm): δ (bpvp) 8.76 (d, 4H, Ph-H), 8.62 (d, 8H, Py-H), 8.45 (s, 2H, Ph-H), 7.61 (d, 8H, Py-H), 7.65 and 7.52 (d, 8H, CH=CH);

$\delta$  (HL<sub>5</sub>) 8.27 (d, 8H, Ph-H), 8.19 (d, 8H, Ph-H) (**Fig. S16a**).

### Photo-irradiation experiment

Crystals (*ca* 0.5 g) of **CP**<sub>1</sub>, **CP**<sub>2</sub>, **CP**<sub>3</sub>, **CP**<sub>4</sub> or **CP**<sub>5</sub> were placed between glass plates and exposed to a 100W high-pressure mercury lamp ( $\lambda = 365$  nm) for 2h to form the corresponding photoproducts of **CP**<sub>1</sub>' , **CP**<sub>2</sub>' , **CP**<sub>3</sub>' , **CP**<sub>4</sub>' or **CP**<sub>5</sub>' , respectively.

### Separation of Isomer $\alpha$ and Isomer $\beta$

**Isomer  $\alpha$** : **CP**<sub>4</sub>' (500 mg) was mixed with 30 mL of NaOH solution (4 M) and stirred at room temperature for 2 h. The solution was extracted with CHCl<sub>3</sub> (3 $\times$ 30 mL) and the combined organic extracts were concentrated *in vacuo* to produce **Isomer  $\alpha$**  as a white powder. Yield: 94% based on **CP**<sub>4</sub>' . mp. 225.6 $^{\circ}$ C-226.0 $^{\circ}$ C. <sup>1</sup>H NMR (400 MHz, CDCl<sub>3</sub>, ppm):  $\delta$  (Isomer  $\alpha$ ) 8.49 (d, 8H, Py-H), 7.87 (m, 4H,Py-H), 7.66 (s, 2H, Py-H), 7.10 (d, 8H, Py-H), 4.73~4.60 (d, 8H, -C<sub>4</sub>H<sub>4-</sub>); <sup>13</sup>C NMR (100 MHz, CDCl<sub>3</sub>):  $\delta$  149.21, 147.27, 147.17, 134.58, 131.55, 122.18, 49.01, 42.05 (**Fig. S19**).

**Isomer  $\beta$** : **Isomer  $\beta$**  (white powder) was obtained in a similar manner to that of Isomer  $\alpha$  but **CP**<sub>1</sub>' (500 mg) was used instead of **CP**<sub>4</sub>' .Yield: 97% based on **CP**<sub>1</sub>' . mp. 244.5 $^{\circ}$ C-245.1 $^{\circ}$ C. <sup>1</sup>H NMR (400 MHz, CDCl<sub>3</sub>, ppm):  $\delta$  (**Isomer  $\beta$** ) 8.50~8.46 (m, 8H, Py-H), 8.07 and 7.85 (s, 4H,Py-H), 7.30 (s, 2H, Py-H), 7.14~7.05 (m, 8H, Py-H), 4.77~4.75 (m, 8H, -C<sub>4</sub>H<sub>4-</sub>); <sup>13</sup>C NMR (100 MHz, CDCl<sub>3</sub>, ppm):  $\delta$  149.23, 149.12, 147.01, 146.79, 144.18, 137.94, 131.78, 131.67, 122.17, 122.03, 48.82, 48.14, 41.92, 41.88 (**Fig. S22** ).

**Single crystal structure determination:** Structures were solved by Direct methods and refined by full-matrix least-squares techniques using the *SHELXL-2014*,



*SHELXL*-2017 or *SHELXL*-2018 programs. Non-hydrogen atoms were refined with anisotropic displacement parameters. The H atoms were introduced at the calculated positions and included in the structure-factor calculations. The SQUEEZE program was used to remove the contribution of the highly disordered lattice solvent (for **CP**<sub>1</sub>). A summary of key crystallographic information for **CP**<sub>1</sub>-**CP**<sub>5</sub>, Isomer  $\alpha$  and Isomer  $\beta$  is given in Table 1. The CCDC codes for these compounds are 2033936-2033942.

**Table S1** Summary of Crystal Data and Structure Refinement Parameters for **CP**<sub>1</sub>-**CP**<sub>5</sub>, Isomer  $\alpha$  and Isomer  $\beta$

|                                           | <b>CP</b> <sub>1</sub> (2033939)                                               | <b>CP</b> <sub>2</sub> (2033938)                                                               | <b>CP</b> <sub>3</sub> (2033937)                                                               | <b>CP</b> <sub>4</sub> (2033936)                                                             |
|-------------------------------------------|--------------------------------------------------------------------------------|------------------------------------------------------------------------------------------------|------------------------------------------------------------------------------------------------|----------------------------------------------------------------------------------------------|
| Empirical formula                         | C <sub>90</sub> H <sub>78</sub> Cd <sub>3</sub> N <sub>6</sub> O <sub>14</sub> | C <sub>87</sub> H <sub>59</sub> Br <sub>7</sub> Cd <sub>3</sub> N <sub>6</sub> O <sub>16</sub> | C <sub>88</sub> H <sub>63</sub> Cd <sub>3</sub> C <sub>17</sub> N <sub>6</sub> O <sub>15</sub> | C <sub>66</sub> H <sub>42</sub> Cd <sub>2</sub> F <sub>8</sub> N <sub>6</sub> O <sub>8</sub> |
| Formula weight                            | 1804.78                                                                        | 2340.97                                                                                        | 2029.79                                                                                        | 1423.85                                                                                      |
| Crystal system                            | Triclinic                                                                      | Triclinic                                                                                      | Triclinic                                                                                      | Triclinic                                                                                    |
| Space group                               | <i>P</i> -1                                                                    | <i>P</i> -1                                                                                    | <i>P</i> -1                                                                                    | <i>P</i> -1                                                                                  |
| <i>a</i> /Å                               | 11.308(5)                                                                      | 11.2823(7)                                                                                     | 11.3948(13)                                                                                    | 11.5990(6)                                                                                   |
| <i>b</i> /Å                               | 20.365(8)                                                                      | 19.7270(13)                                                                                    | 19.656(2)                                                                                      | 12.8851(9)                                                                                   |
| <i>c</i> /Å                               | 20.908(9)                                                                      | 21.7507(15)                                                                                    | 21.412(3)                                                                                      | 21.3522(12)                                                                                  |
| $\alpha$ /°                               | 110.484(5)                                                                     | 67.5530(10)                                                                                    | 67.534(2)                                                                                      | 101.600(5)                                                                                   |
| $\beta$ /°                                | 100.264(6)                                                                     | 90.2020(10)                                                                                    | 90.301(3)                                                                                      | 103.465(4)                                                                                   |
| $\gamma$ /°                               | 96.098(6)                                                                      | 73.3800                                                                                        | 73.1500                                                                                        | 94.762(5)                                                                                    |
| <i>V</i> /Å <sup>3</sup>                  | 4364(3)                                                                        | 4252.5(5)                                                                                      | 4204.8(9)                                                                                      | 3011.7(3)                                                                                    |
| <i>D</i> <sub>c</sub> /g cm <sup>-3</sup> | 1.374                                                                          | 1.828                                                                                          | 1.603                                                                                          | 1.570                                                                                        |
| <i>Z</i>                                  | 2                                                                              | 2                                                                                              | 2                                                                                              | 2                                                                                            |
| $\mu$ (Mo-K $\alpha$ )/mm <sup>-1</sup>   | 0.788                                                                          | 4.102                                                                                          | 1.044                                                                                          | 0.793                                                                                        |
| Total reflections                         | 23755                                                                          | 42492                                                                                          | 36877                                                                                          | 24099                                                                                        |
| Unique reflections                        | 15144                                                                          | 14898                                                                                          | 14361                                                                                          | 10598                                                                                        |
| No. observations                          | 10888                                                                          | 10698                                                                                          | 8718                                                                                           | 6289                                                                                         |
| No. parameters                            | 1058                                                                           | 1087                                                                                           | 1074                                                                                           | 811                                                                                          |
| <i>F</i> (000)                            | 1832                                                                           | 2280                                                                                           | 2032                                                                                           | 1424                                                                                         |
| R <sub>1</sub> <sup>a</sup>               | 0.0432 (10888)                                                                 | 0.0674 (10698)                                                                                 | 0.0783 (8718)                                                                                  | 0.0554 (6289)                                                                                |
| wR <sub>2</sub> <sup>b</sup>              | 0.1321 (15144)                                                                 | 0.2160 (14898)                                                                                 | 0.2481 (14361)                                                                                 | 0.1361 (10598)                                                                               |
| GOF <sup>c</sup>                          | 1.014                                                                          | 1.043                                                                                          | 1.047                                                                                          | 1.031                                                                                        |

to be continued for **Table S1**

|                                          | <b>CP<sub>5</sub> (2033940)</b>                                                 | <b>Isomer <math>\alpha</math> (2033941)</b>                                   | <b>Isomer <math>\beta</math> (2033942)</b>                    |
|------------------------------------------|---------------------------------------------------------------------------------|-------------------------------------------------------------------------------|---------------------------------------------------------------|
| Empirical formula                        | C <sub>99</sub> H <sub>71</sub> Cd <sub>3</sub> N <sub>15</sub> O <sub>25</sub> | C <sub>39</sub> H <sub>35</sub> Cl <sub>3</sub> N <sub>6</sub> O <sub>2</sub> | C <sub>38</sub> H <sub>36</sub> N <sub>6</sub> O <sub>3</sub> |
| Formula weight                           | 2201.89                                                                         | 726.08                                                                        | 624.73                                                        |
| Crystal system                           | Monoclinic                                                                      | Triclinic                                                                     | Monoclinic                                                    |
| Space group                              | <i>C2/c</i>                                                                     | <i>P-1</i>                                                                    | <i>P2<sub>1</sub>/c</i>                                       |
| <i>a</i> /Å                              | 41.888(16)                                                                      | 12.2763(11)                                                                   | 10.8951(5)                                                    |
| <i>b</i> /Å                              | 13.237(5)                                                                       | 12.7413(12)                                                                   | 18.6016(8)                                                    |
| <i>c</i> /Å                              | 37.521(13)                                                                      | 13.7157(13)                                                                   | 19.3051(9)                                                    |
| $\alpha$ /°                              | 90                                                                              | 76.210(8)                                                                     | 90                                                            |
| $\beta$ /°                               | 102.236(13)                                                                     | 67.384(9)                                                                     | 90.318(6)                                                     |
| $\gamma$ /°                              | 90                                                                              | 63.288(9)                                                                     | 90                                                            |
| <i>V</i> /Å <sup>3</sup>                 | 20332(13)                                                                       | 1763.4(3)                                                                     | 3912.4(3)                                                     |
| <i>D<sub>c</sub></i> /g cm <sup>-3</sup> | 1.439                                                                           | 1.367                                                                         | 10.61                                                         |
| <i>Z</i>                                 | 8                                                                               | 2                                                                             | 4                                                             |
| $\mu$ /mm <sup>-1</sup>                  | 0.701                                                                           | 0.305                                                                         | 0.551                                                         |
| Total reflections                        | 66726                                                                           | 12673                                                                         | 43859                                                         |
| Unique reflections                       | 17740                                                                           | 6219                                                                          | 7129                                                          |
| No. observations                         | 14996                                                                           | 4097                                                                          | 4490                                                          |
| No. parameters                           | 1288                                                                            | 451                                                                           | 478                                                           |
| <i>F</i> (000)                           | 8880                                                                            | 756                                                                           | 1320.0                                                        |
| <i>R</i> <sub>1</sub> <sup>a</sup>       | 0.0500(14996)                                                                   | 0.0788(4097)                                                                  | 0.0378(4490)                                                  |
| <i>wR</i> <sub>2</sub> <sup>b</sup>      | 0.1440(17740)                                                                   | 0.2138(6219)                                                                  | 0.1032(7129)                                                  |
| GOF <sup>c</sup>                         | 1.107                                                                           | 1.064                                                                         | 1.047                                                         |

<sup>a</sup> $R_1 = \Sigma||F_o| - |F_c||/\Sigma|F_o|$ . <sup>b</sup> $wR_2 = \{\Sigma w(F_o^2 - F_c^2)^2/\Sigma w(F_o^2)^2\}^{1/2}$ . <sup>c</sup>GOF =  $\{\Sigma w((F_o^2 - F_c^2)^2)/(n - p)\}^{1/2}$ , where *n* = number of reflections and *p* = total number of parameters refined.

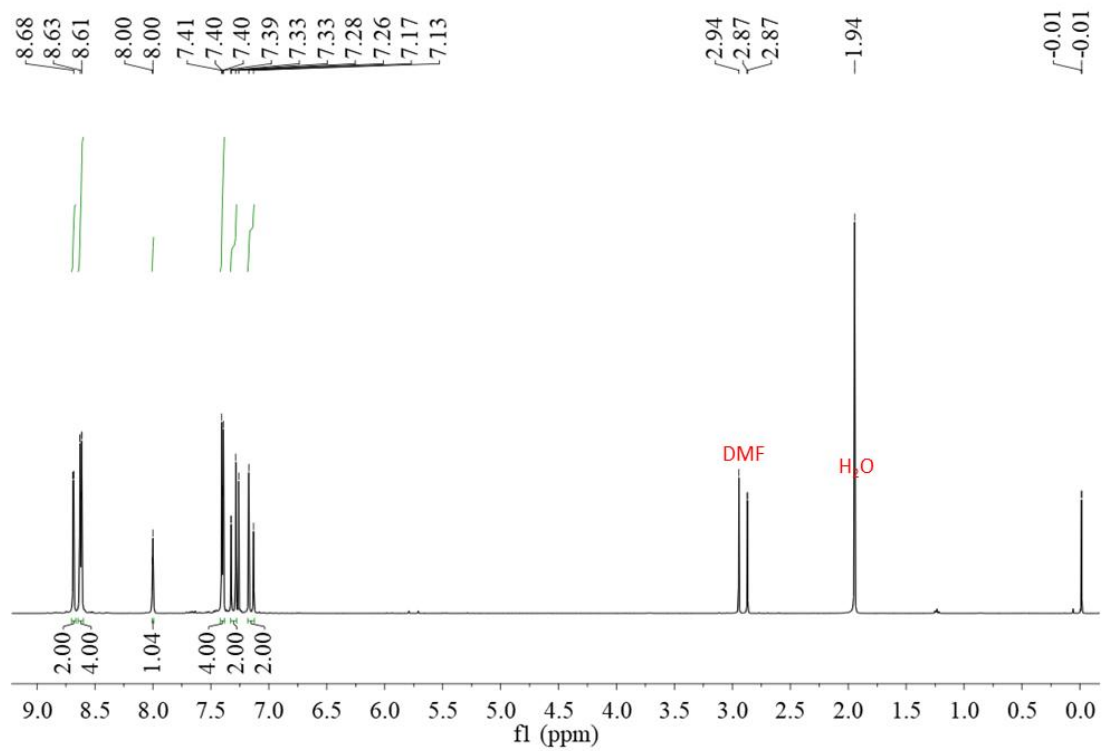

(a)

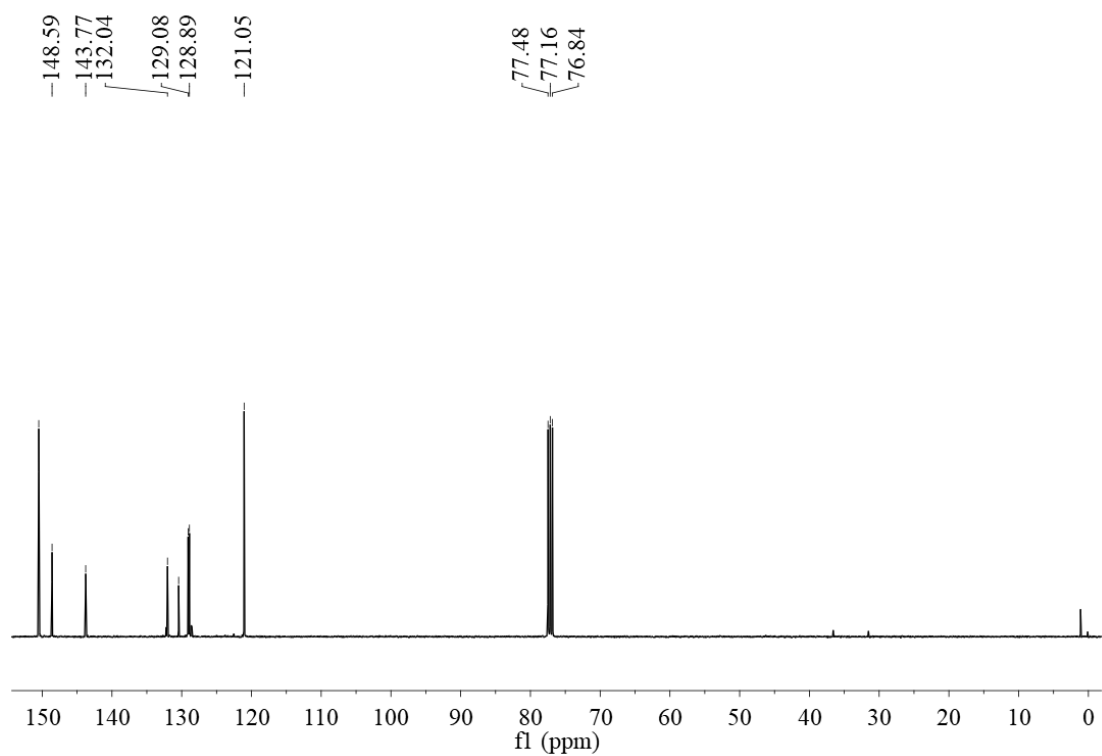

(b)

**Fig. S1** The  $^1\text{H}$  (a), and  $^{13}\text{C}$  (b) NMR spectra of **bpvp** in  $\text{CDCl}_3$ .

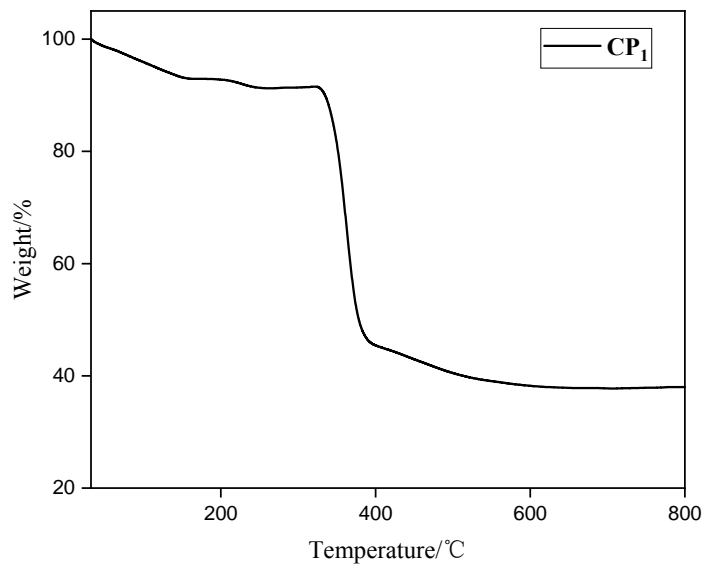

(a)

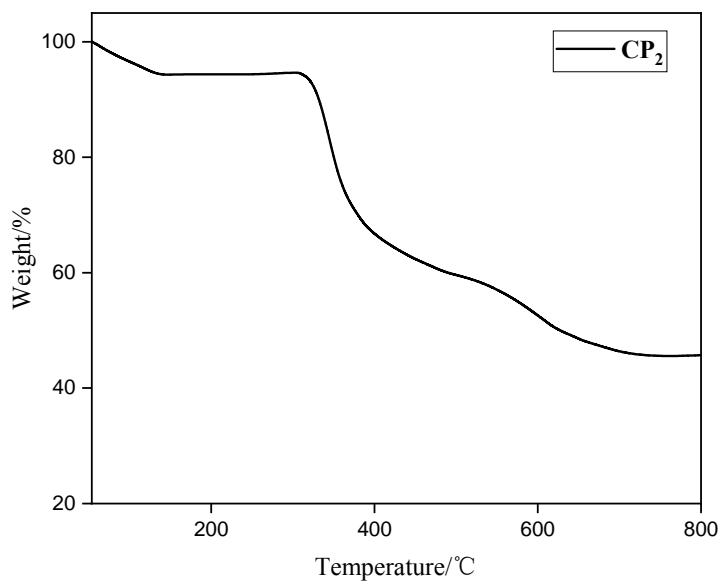

(b)

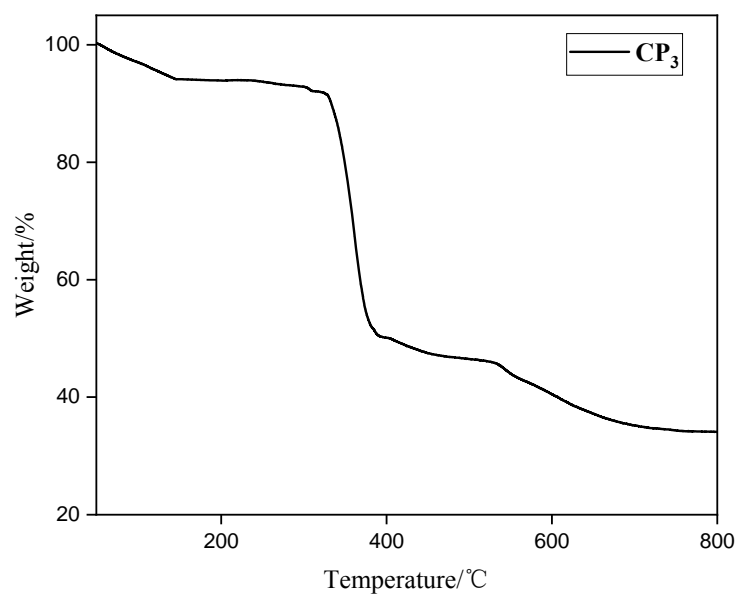

(c)

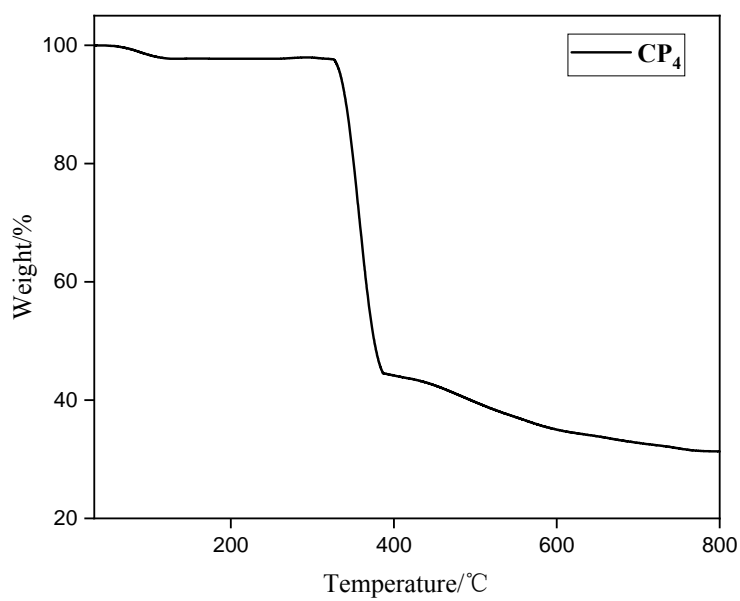

(d)

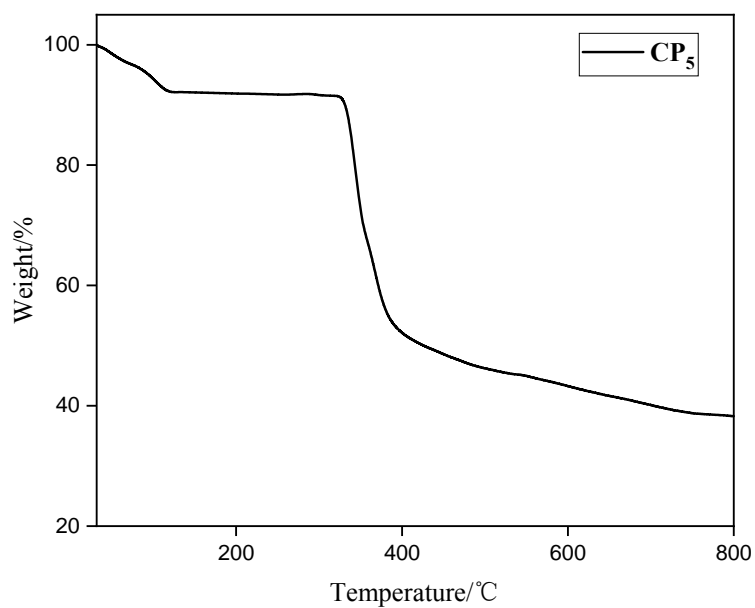

(e)

**Fig. S2** Thermogravimetric analysis plots of (CP<sub>1</sub>(a), CP<sub>2</sub>(b), CP<sub>3</sub>(c), CP<sub>4</sub>(d), CP<sub>5</sub>(e).

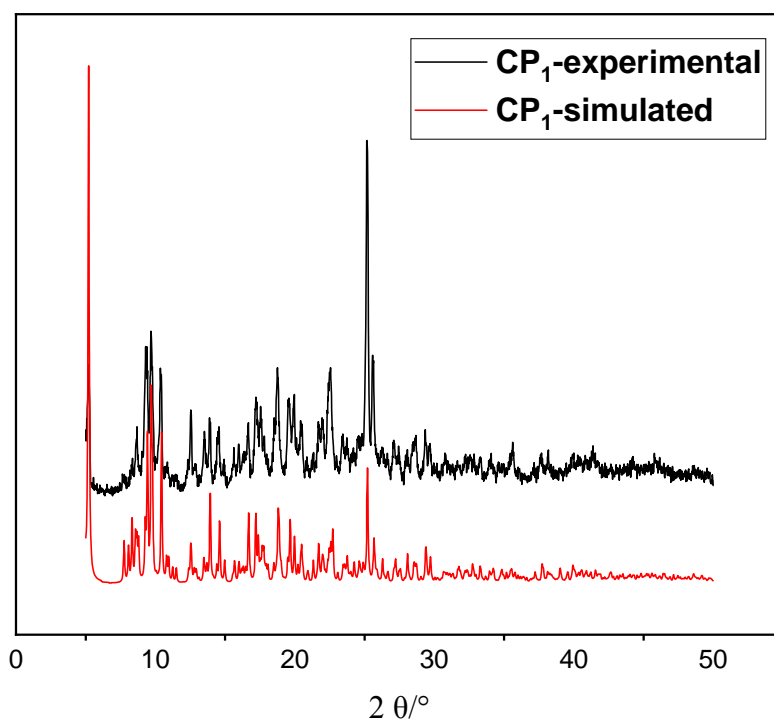

(a)

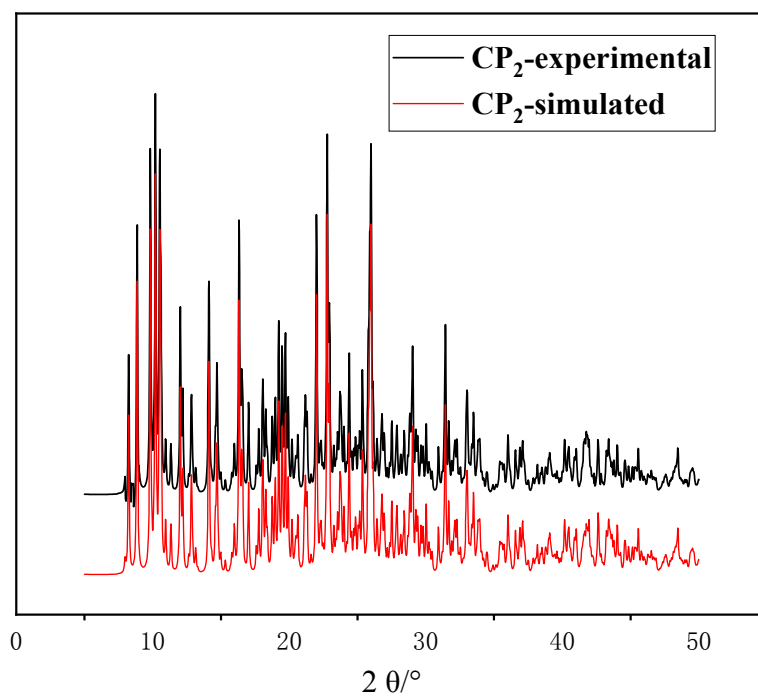

(b)

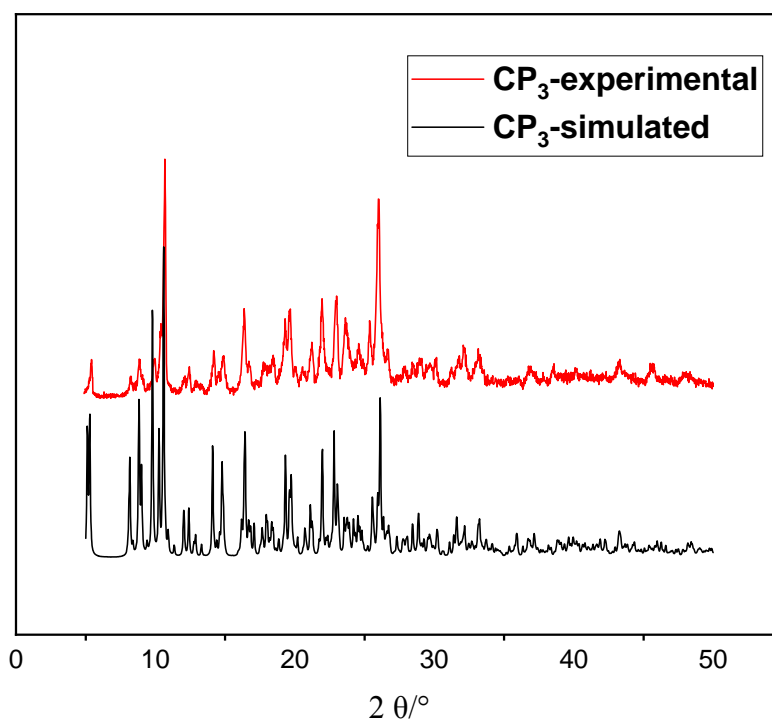

(c)

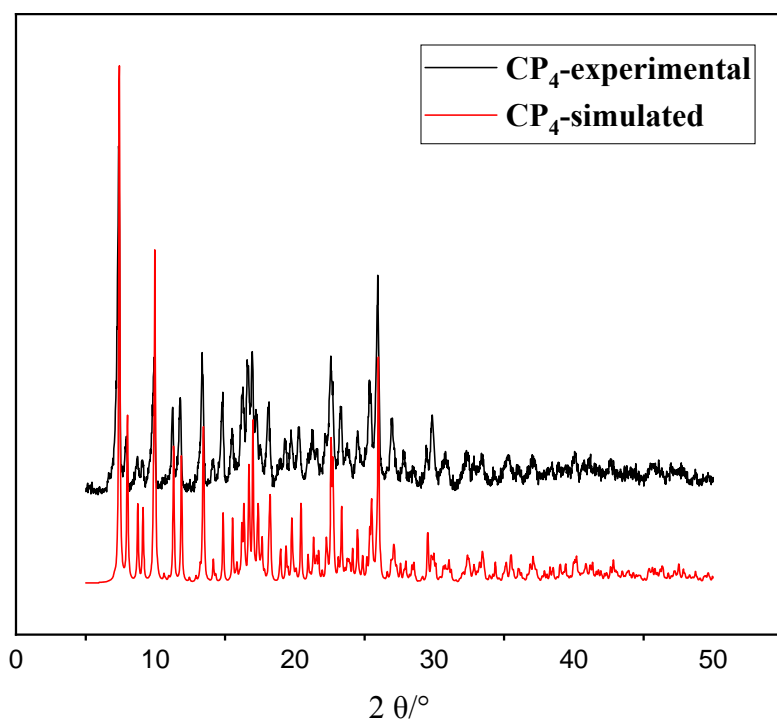

(d)

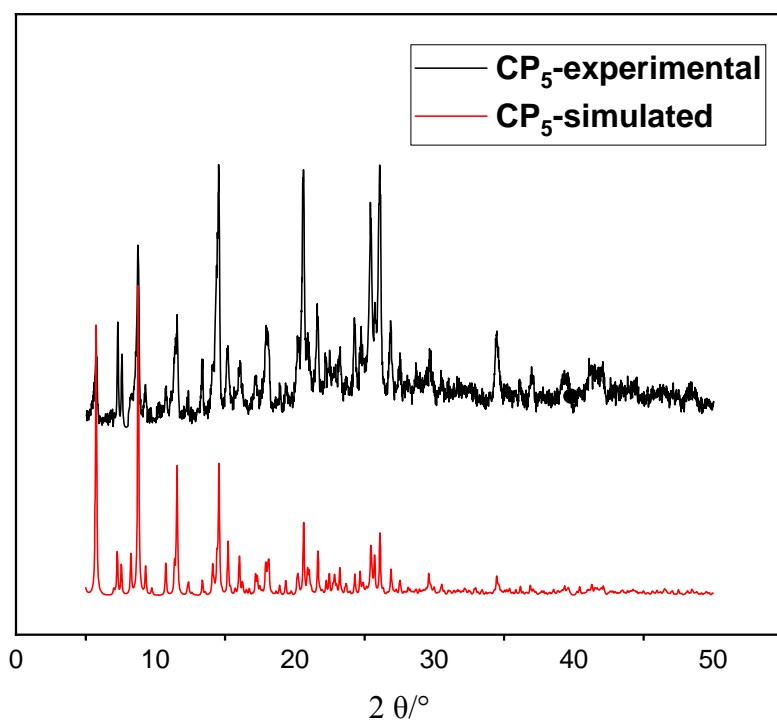

(e)

**Fig. S3** PXRd patterns of CP<sub>1</sub> (a), CP<sub>2</sub> (b), CP<sub>3</sub> (c), CP<sub>4</sub> (d), CP<sub>5</sub> (e).



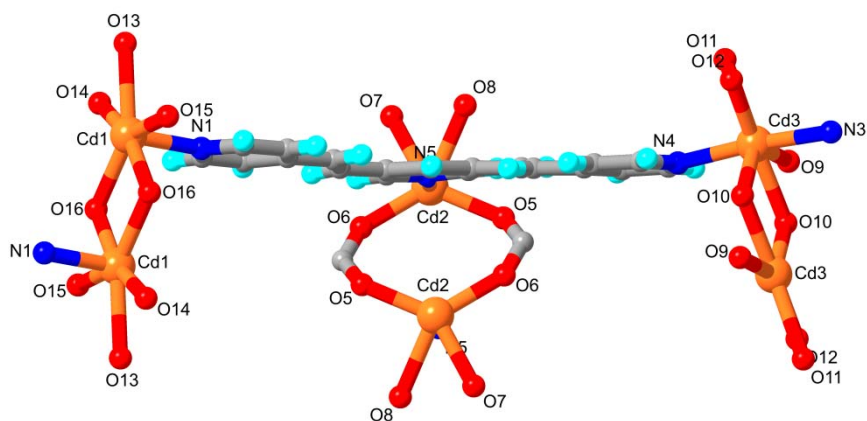

**Fig. S4** View of the coordination environments of Cd(II) centers in CP<sub>1</sub>.

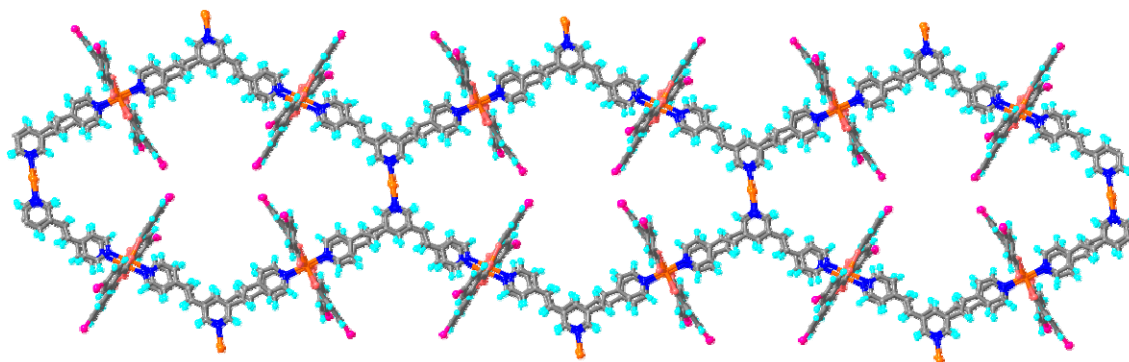

**Fig. S5** The adjacent zigzag chains are connected to form a 2D network.

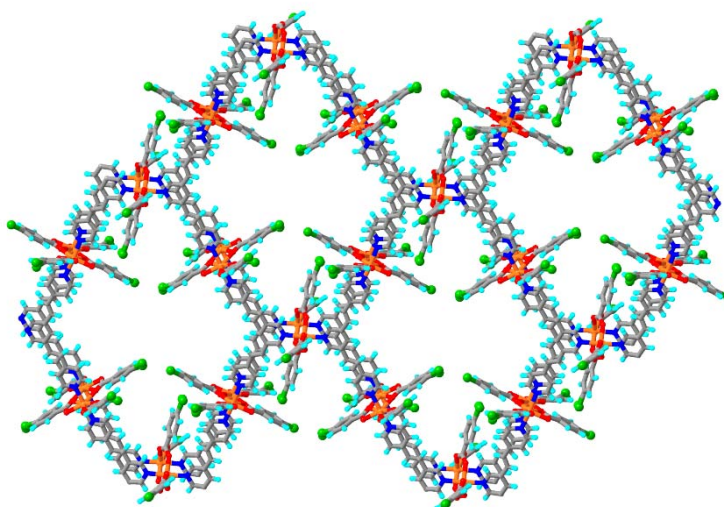

**Fig. S6** View of the 2D network showing hexagonal windows.

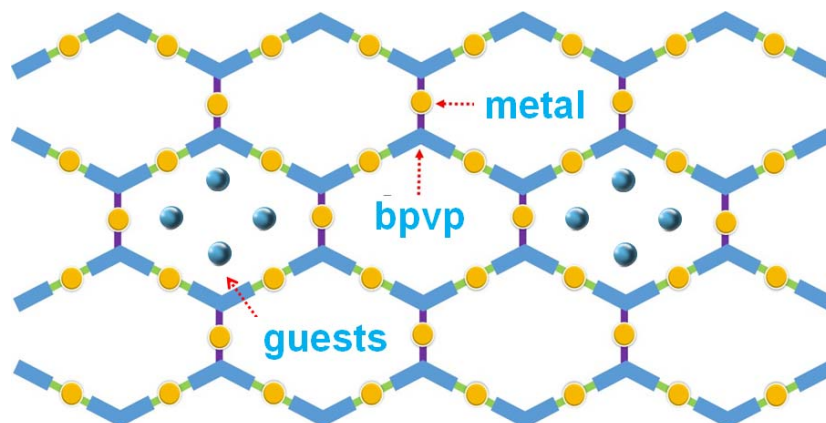

Fig. S7 Cartoon showing the 2D network in CP<sub>1</sub>-CP<sub>3</sub>.

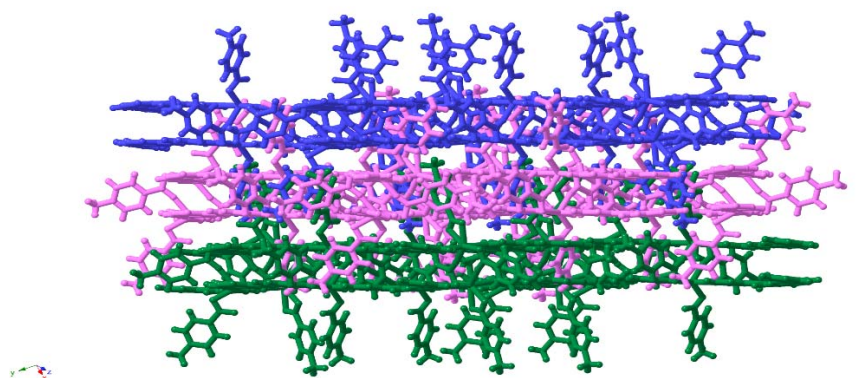

(a)

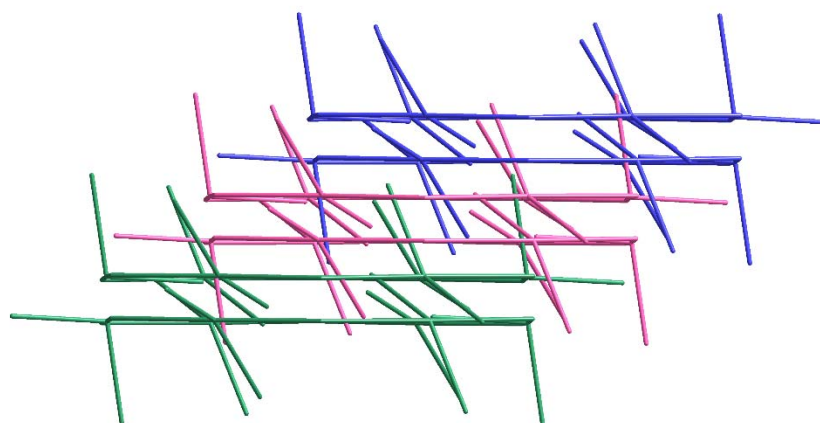

(b)

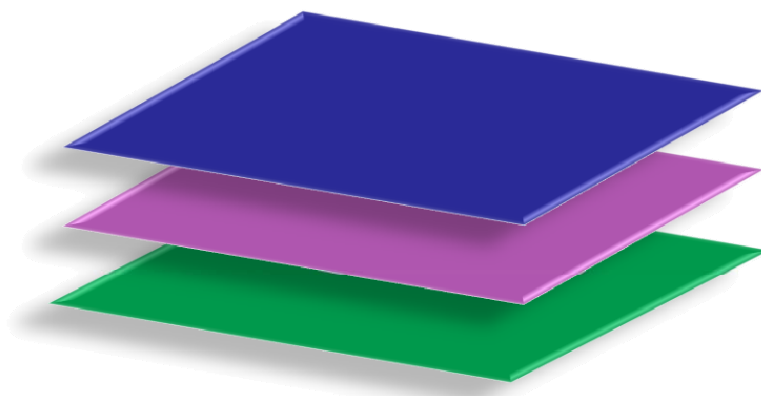

(c)

**Fig. S8** (a) 3D polypseudo-threading network; (b) A schematic illustration of three adjacent 2D layers; (c) A schematic illustration of the mutual polypseudo-threading of three layers.

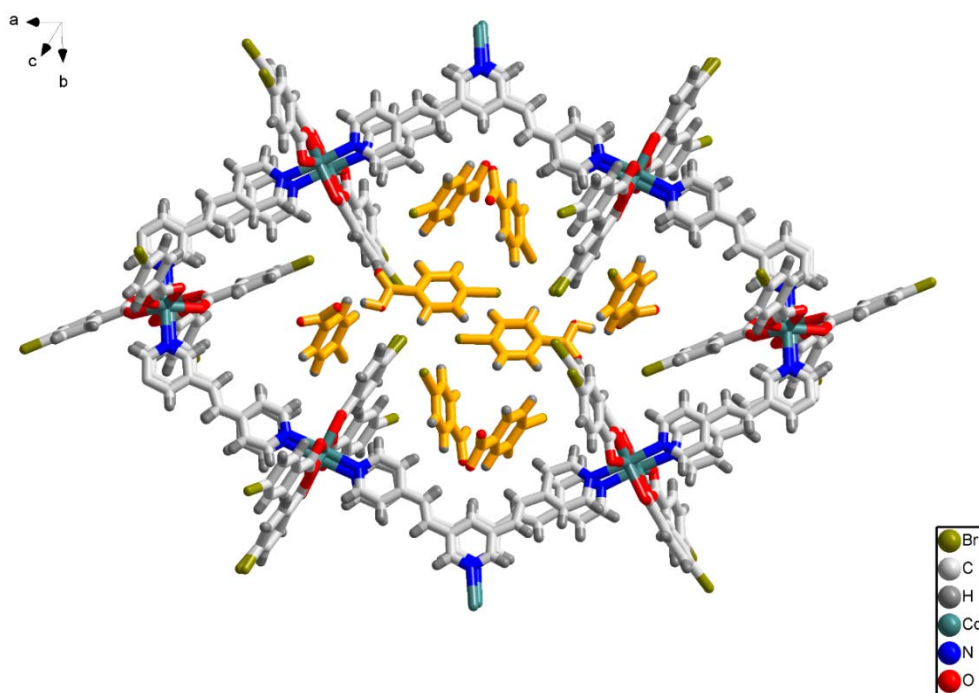

**Fig. S9** Fourteen  $L_2$  (or  $HL_2$ ) molecules were embedded in the hexagonal window in  $CP_2$ .

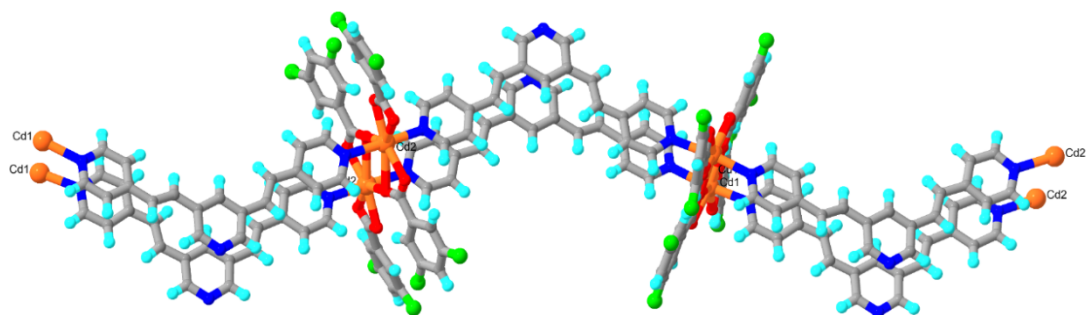

(a)

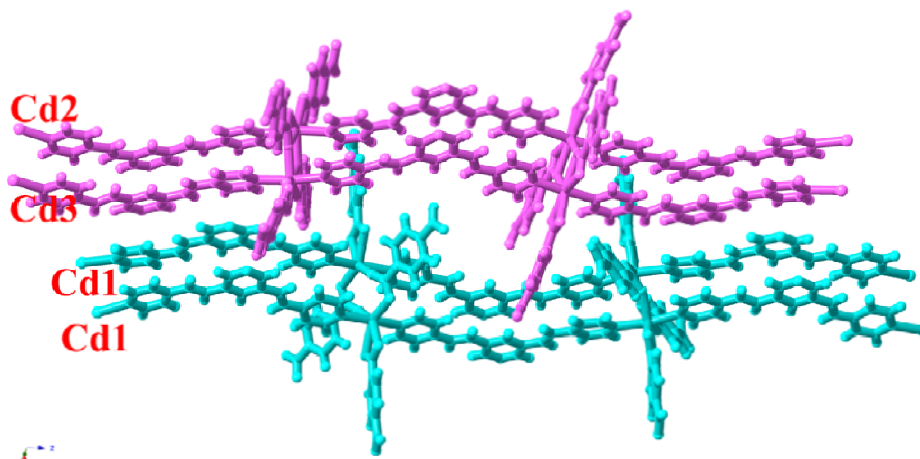

(b)

**Fig. S10** View of the 1D chain structures of CP<sub>4</sub> (a) and CP<sub>5</sub> (b).

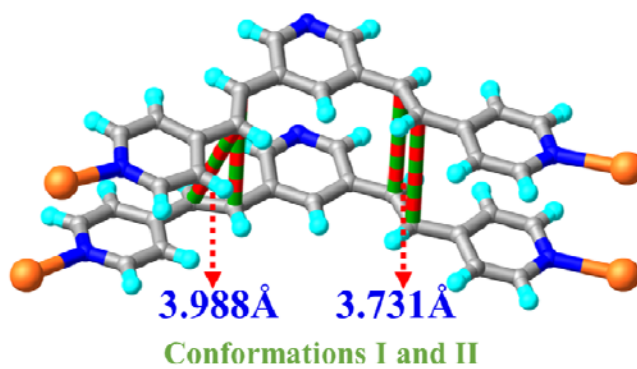

(a)

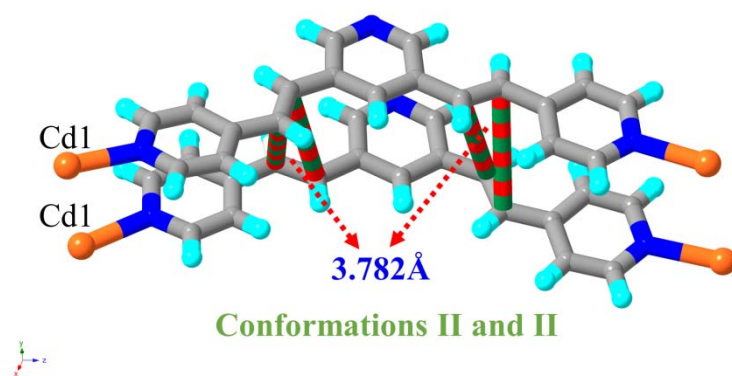

(b)

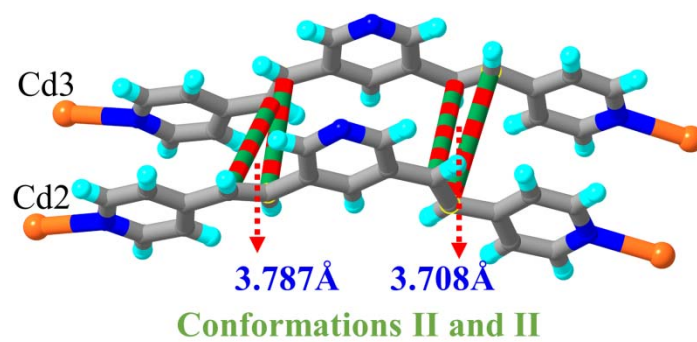

(c)

**Fig. S11** View of the distances between each pair of C=C in CP<sub>4</sub> (a) and CP<sub>5</sub> (b), showing the face-to-face alignment of each bvpv pair in CP<sub>4</sub> and CP<sub>5</sub>.

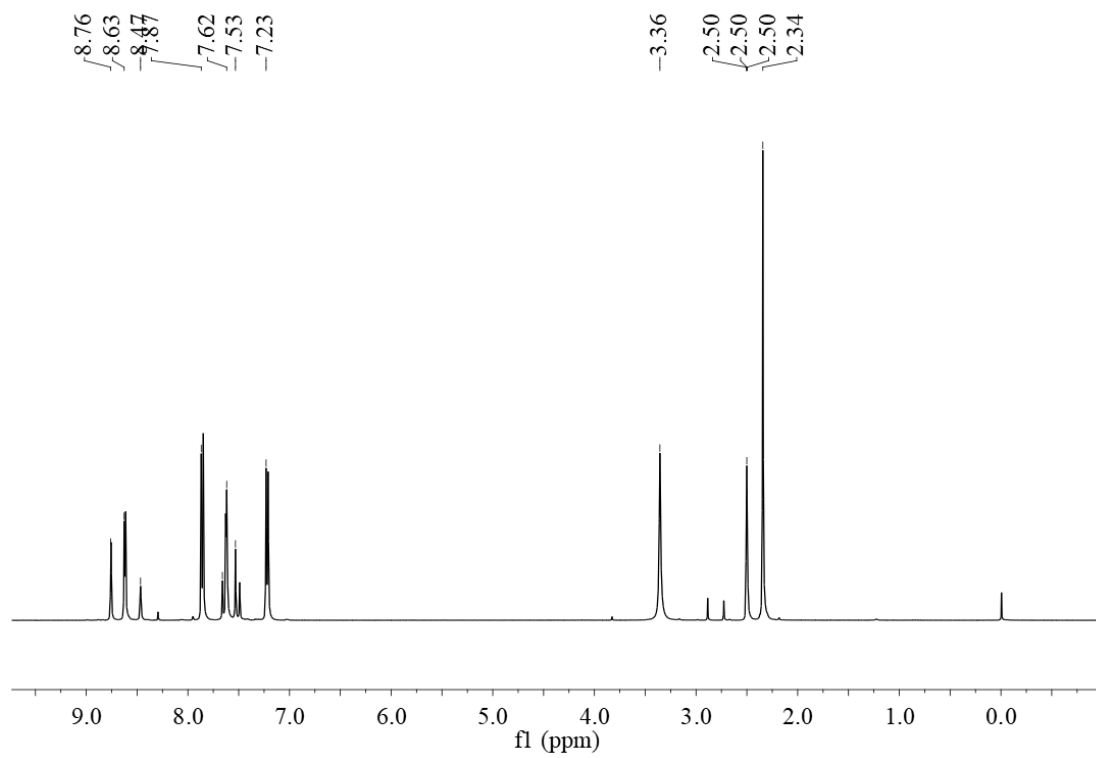

(a)

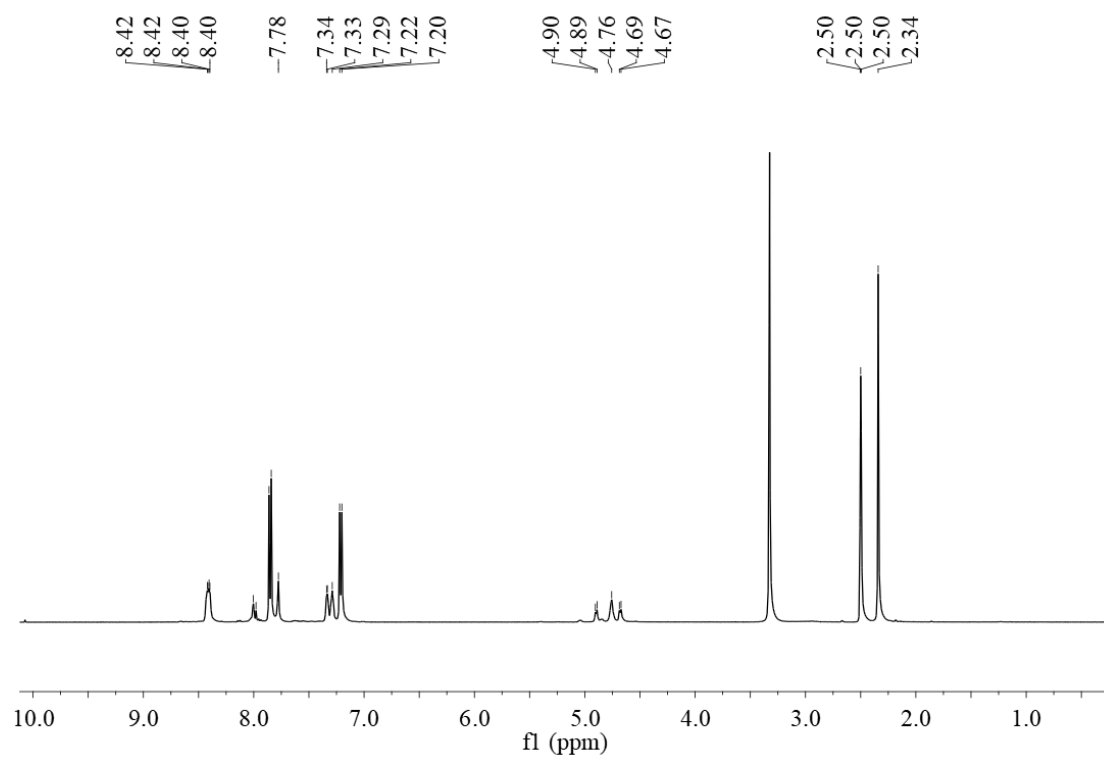

(b)

**Fig. S12** (a) The  $^1\text{H}$  NMR spectrum of  $\text{CP}_1$ ; (b) The  $^1\text{H}$  NMR spectrum of  $\text{CP}_1'$  ( $\text{DMSO-}d_6$ ).

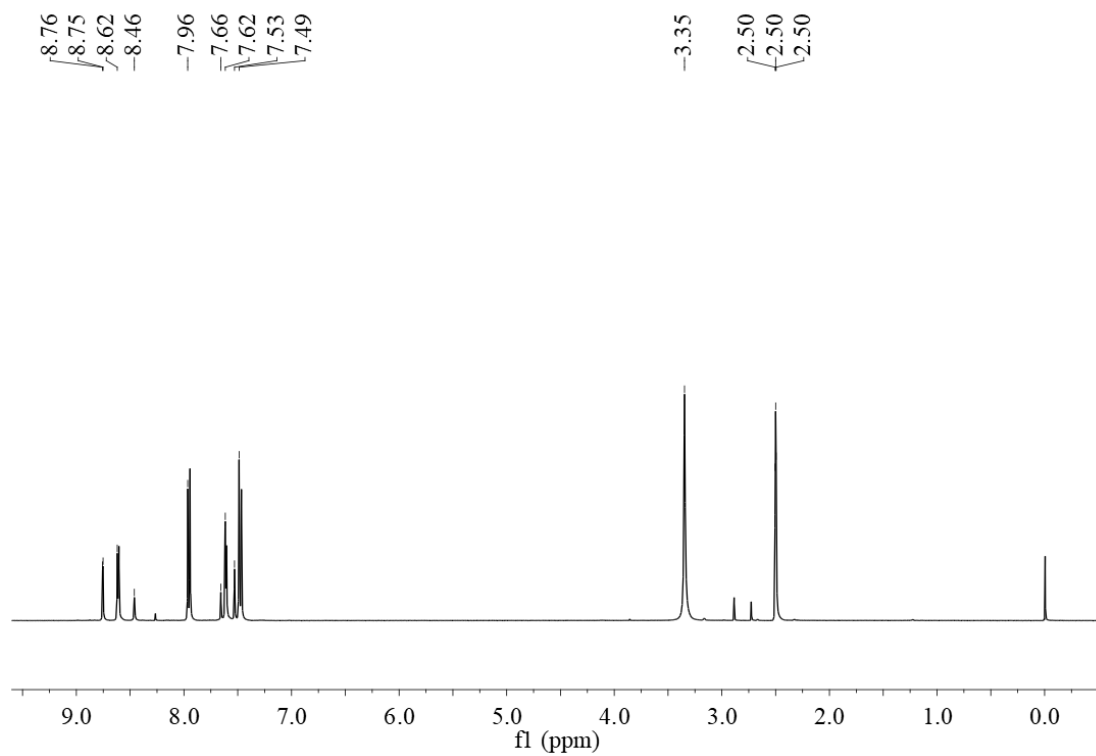

(a)

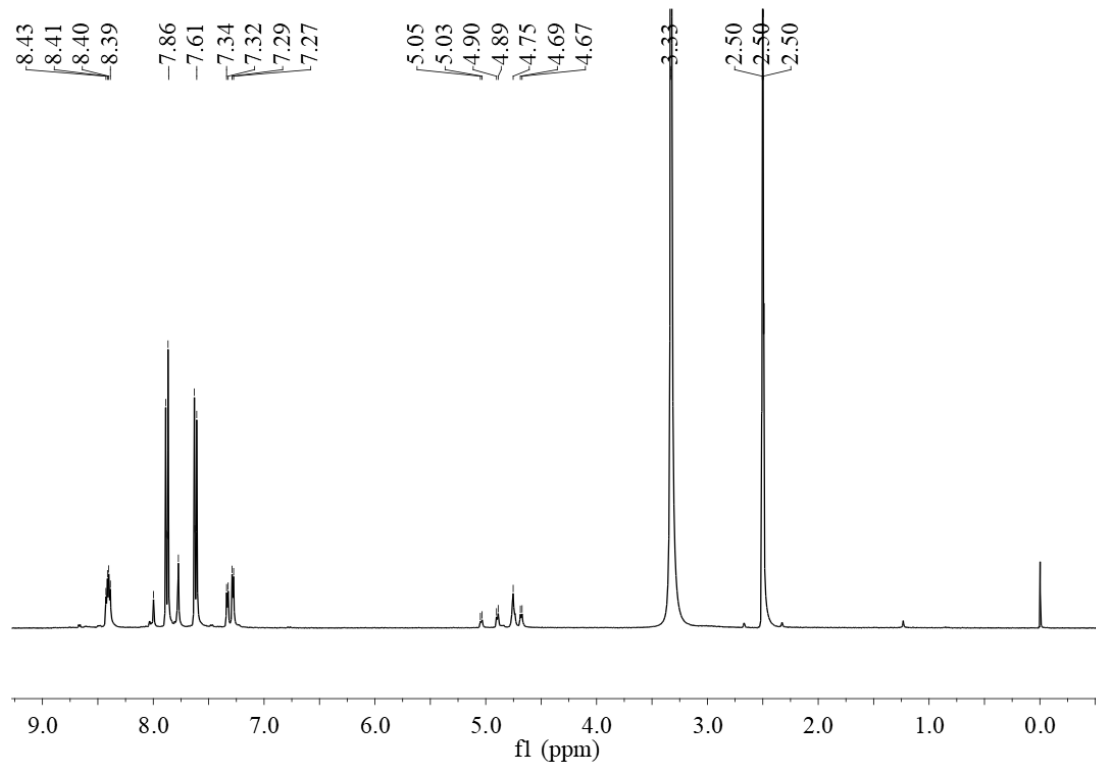

(b)

**Fig. S13** (a) The  $^1\text{H}$  NMR spectrum of  $\text{CP}_2$ ; (b) The  $^1\text{H}$  NMR spectrum of  $\text{CP}_2'$  ( $\text{DMSO-}d_6$ ).

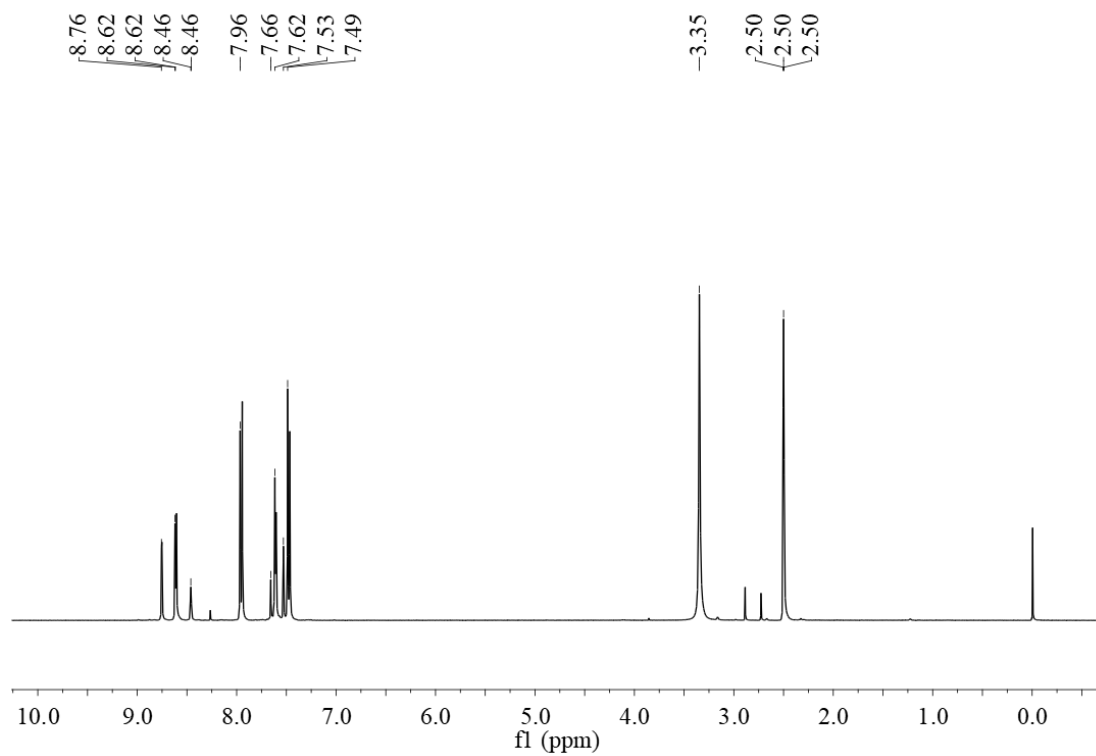

(a)

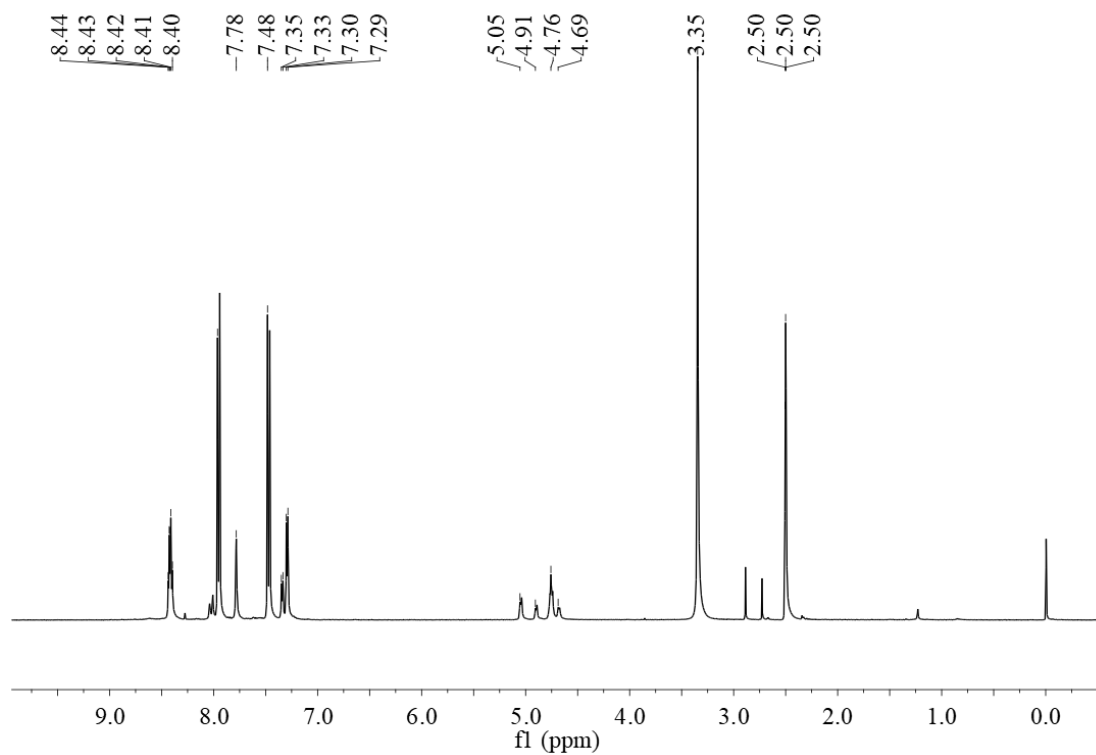

(b)

**Fig. S14** (a) The  $^1\text{H}$  NMR spectrum of  $\text{CP}_3$ ; (b) The  $^1\text{H}$  NMR spectrum of  $\text{CP}_3'$  ( $\text{DMSO-}d_6$ ).



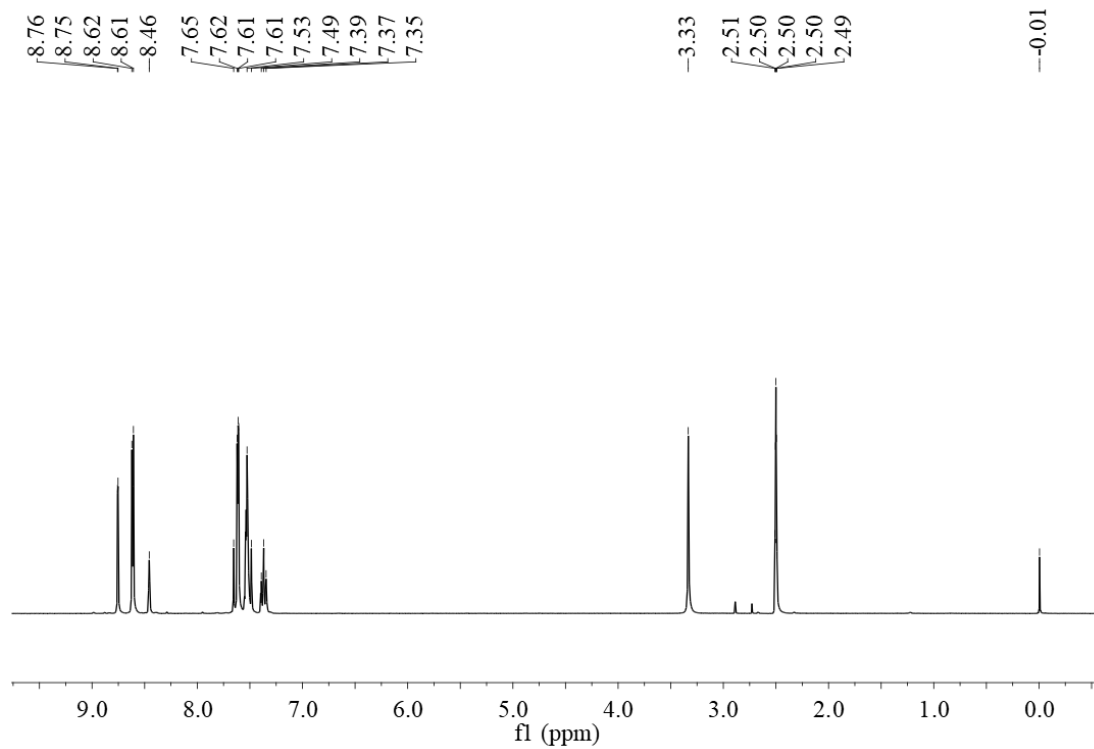

(a)

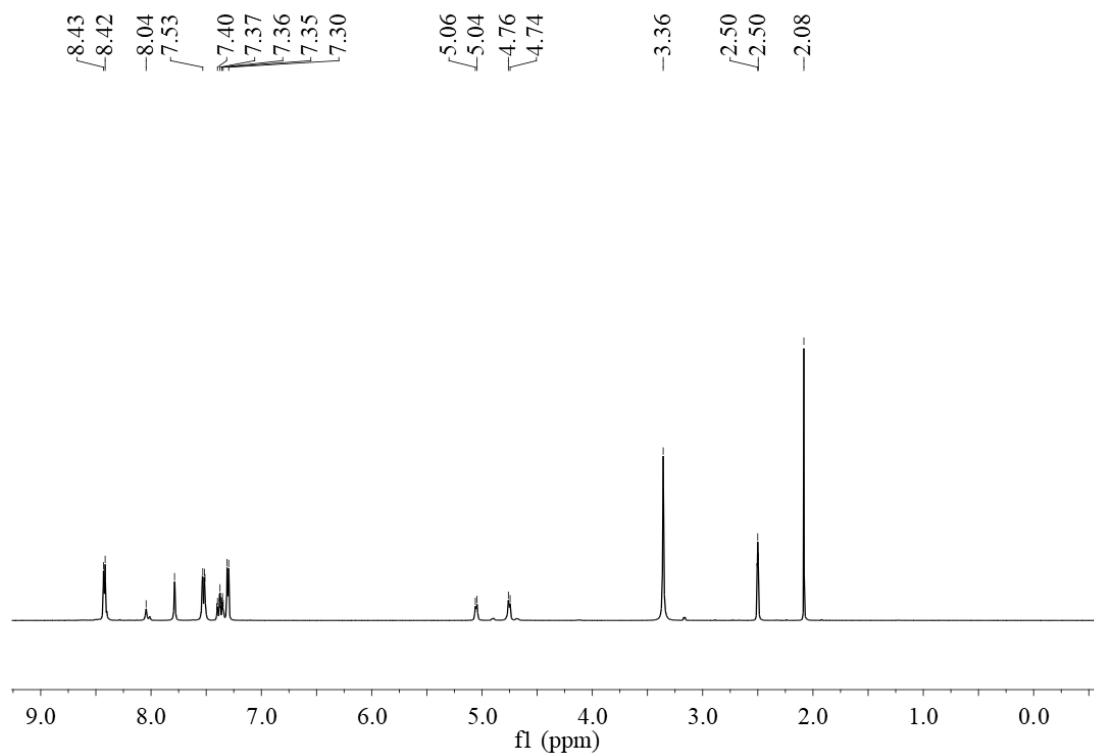

(b)

**Fig. S15** (a) The  $^1\text{H}$  NMR spectrum of  $\text{CP}_4$ ; (b) The  $^1\text{H}$  NMR spectrum of  $\text{CP}_4'$  ( $\text{DMSO-}d_6$ ).

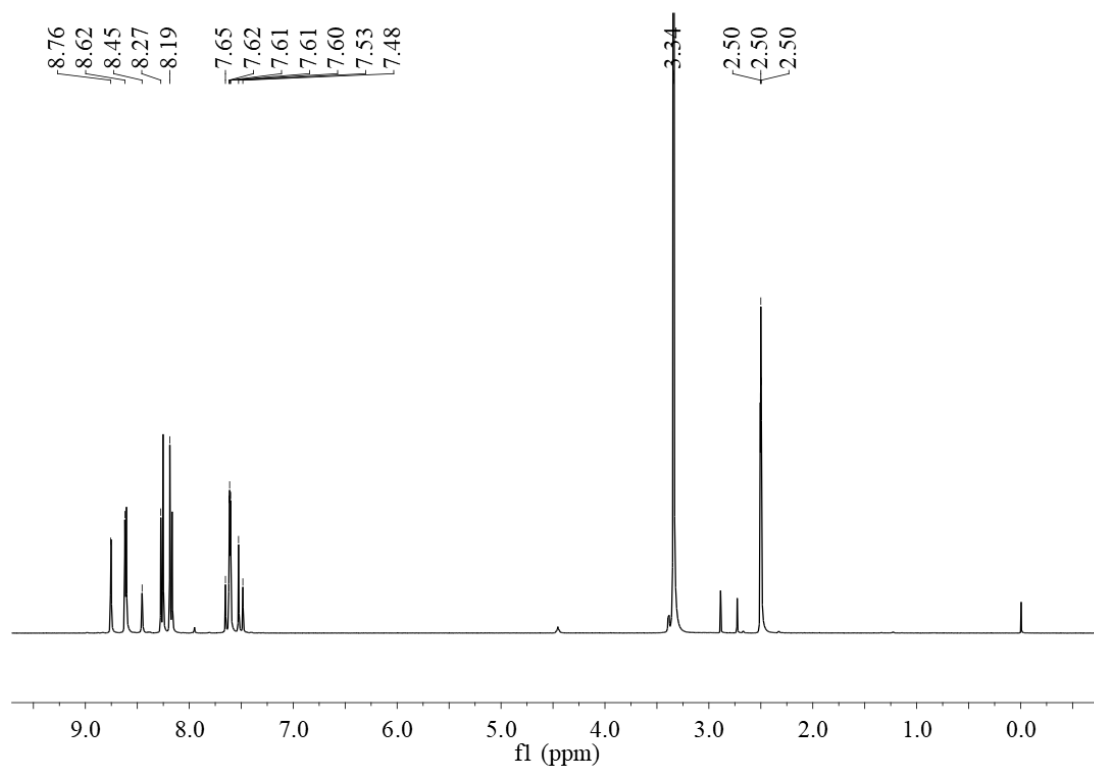

(a)

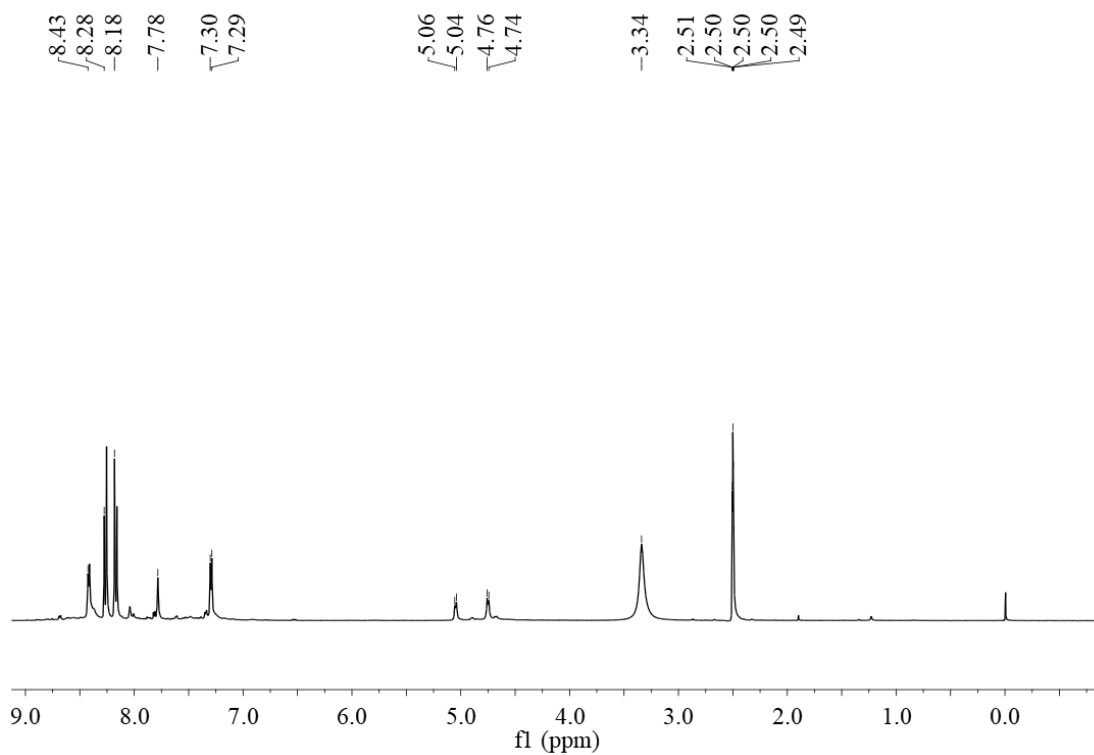

(b)

**Fig. S16** (a) The  $^1\text{H}$  NMR spectrum of  $\text{CP}_5$ ; (b) The  $^1\text{H}$  NMR spectrum of  $\text{CP}_5'$  ( $\text{DMSO-}d_6$ ).

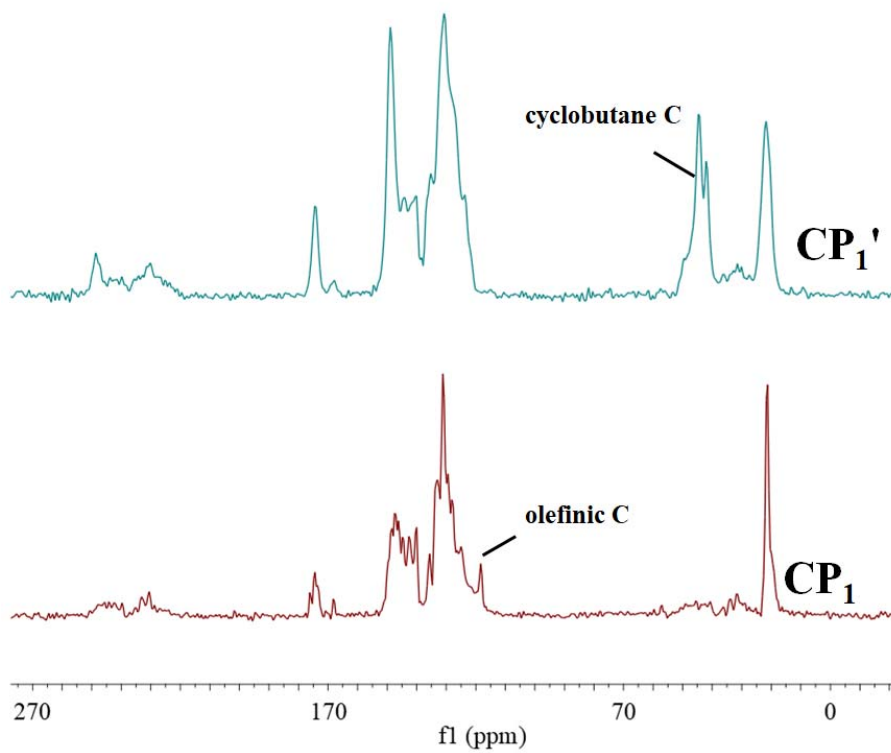

(a)

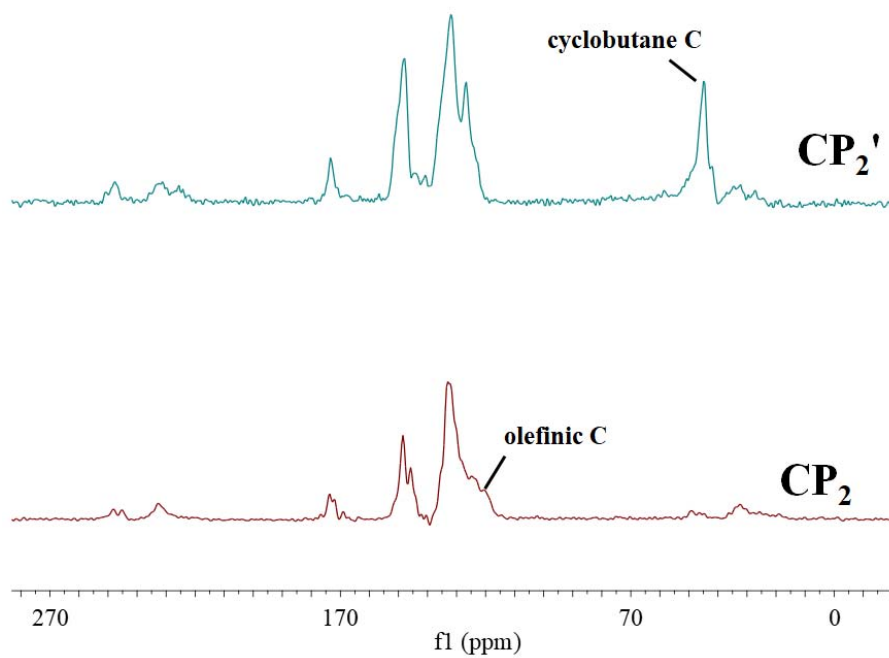

(b)

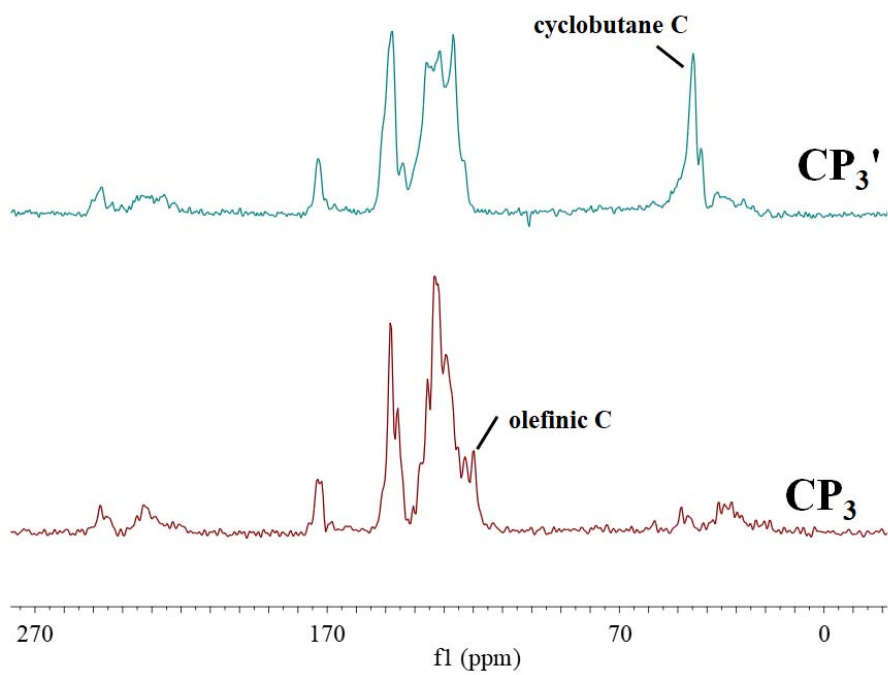

(c)

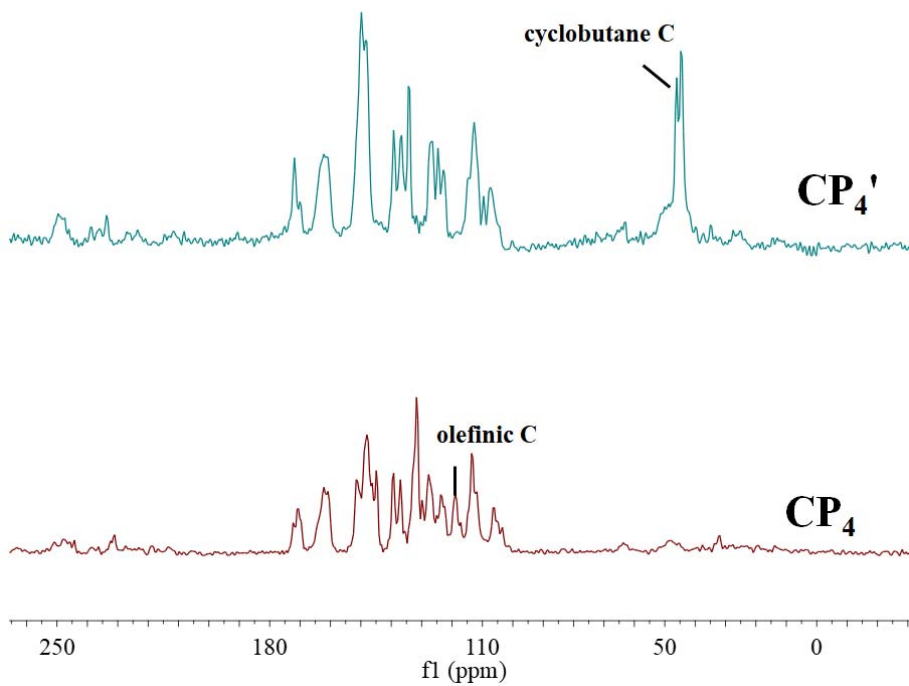

(d)

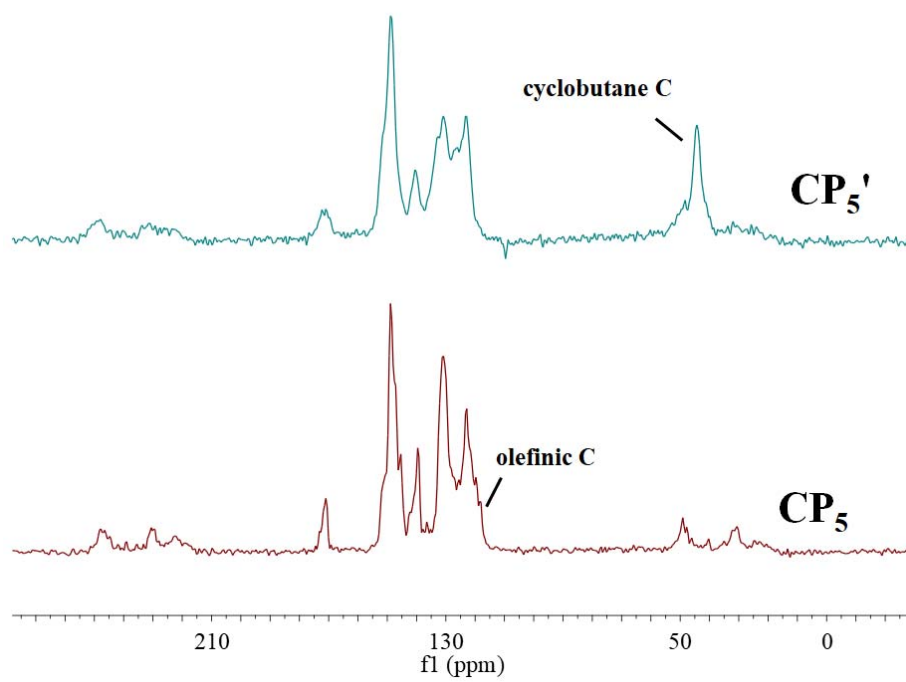

(e)

**Fig. S17** The CPMAS  $^{13}\text{C}$  NMR spectra of  $\text{CP}_1$  to  $\text{CP}_1'$  (a),  $\text{CP}_2$  to  $\text{CP}_2'$  (b),  $\text{CP}_3$  to  $\text{CP}_3'$  (c),  $\text{CP}_4$  to  $\text{CP}_4'$  (d),  $\text{CP}_5$  to  $\text{CP}_5'$  (e).

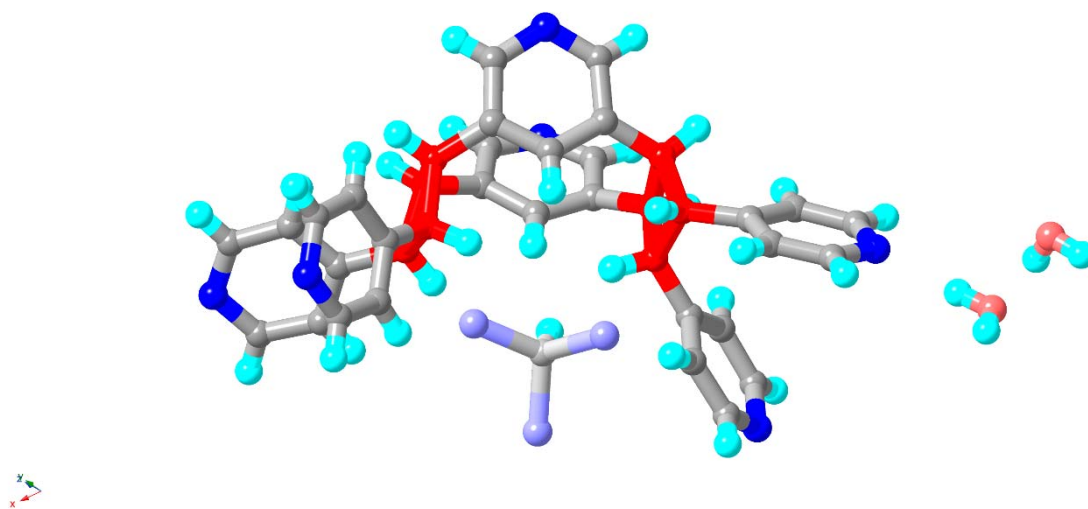

**Fig. S18** The crystal structure of Isomer  $\alpha$ .

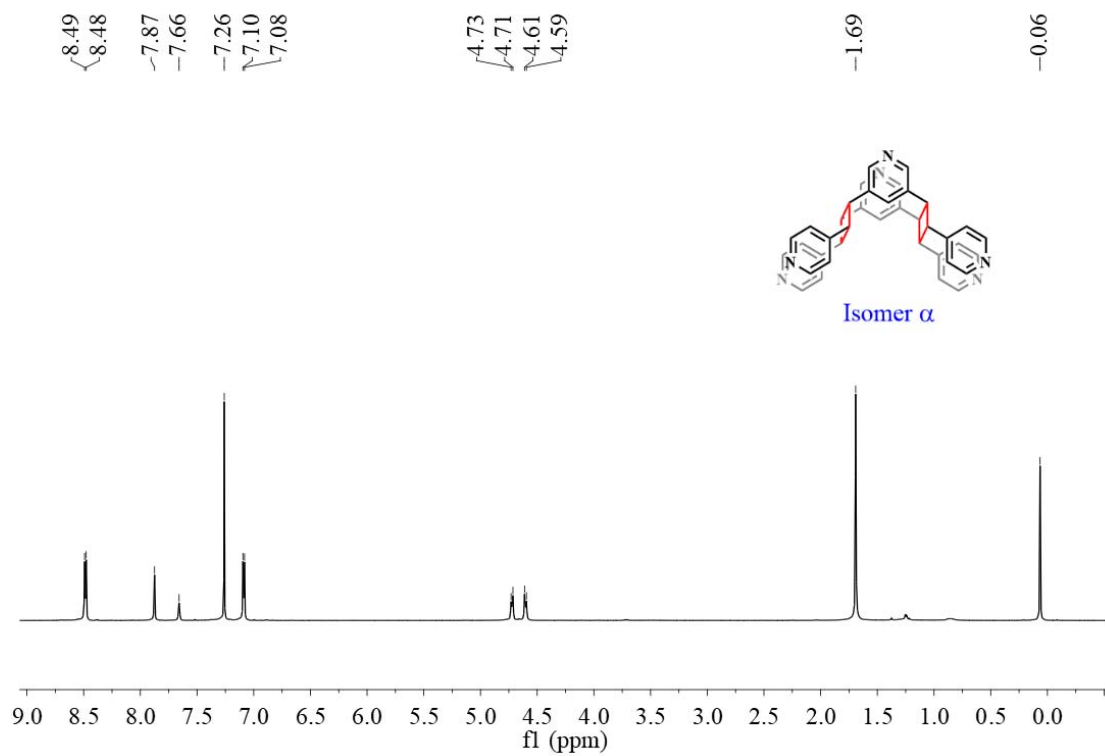

(a)

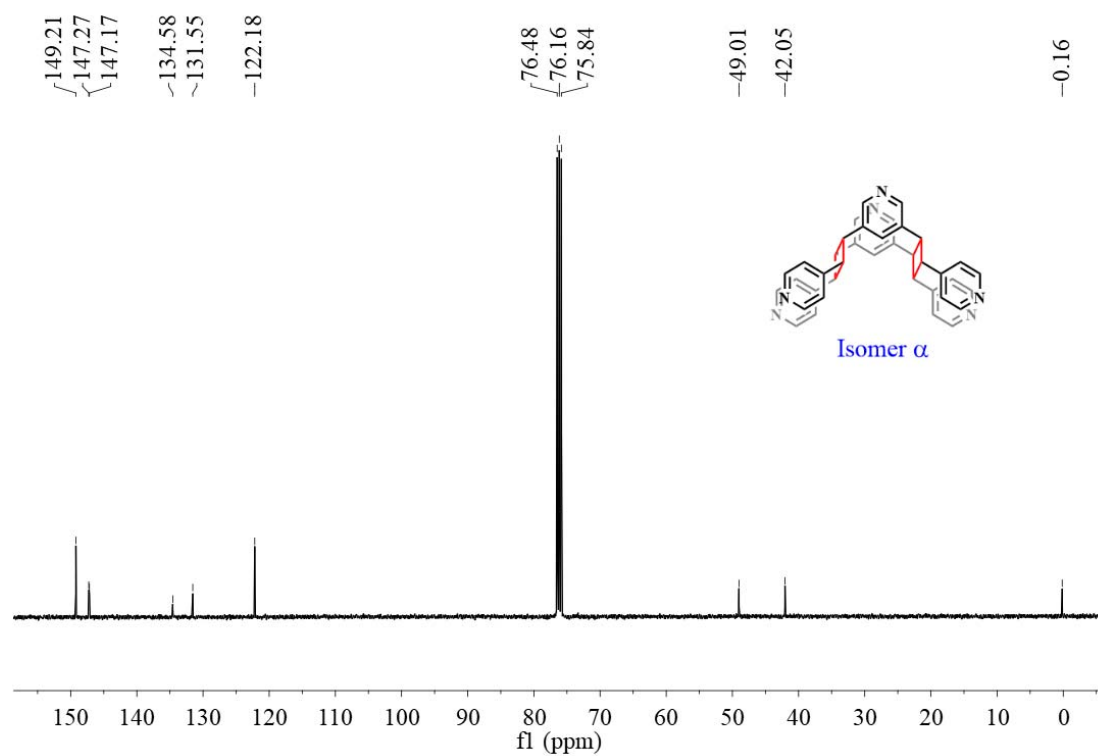

(b)

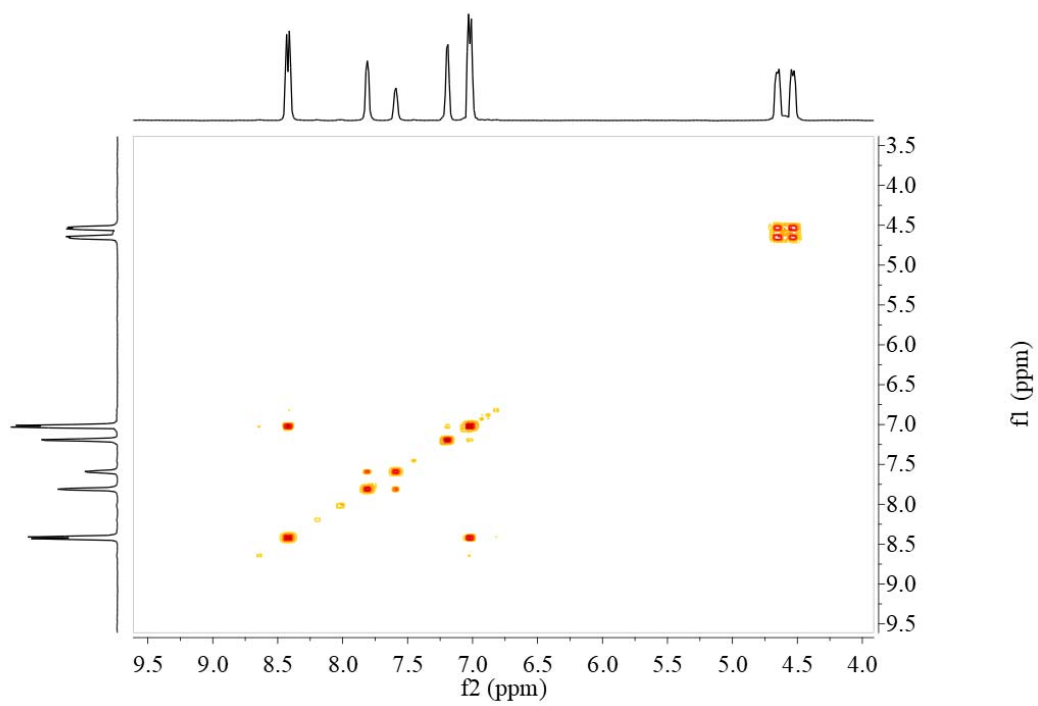

(c)

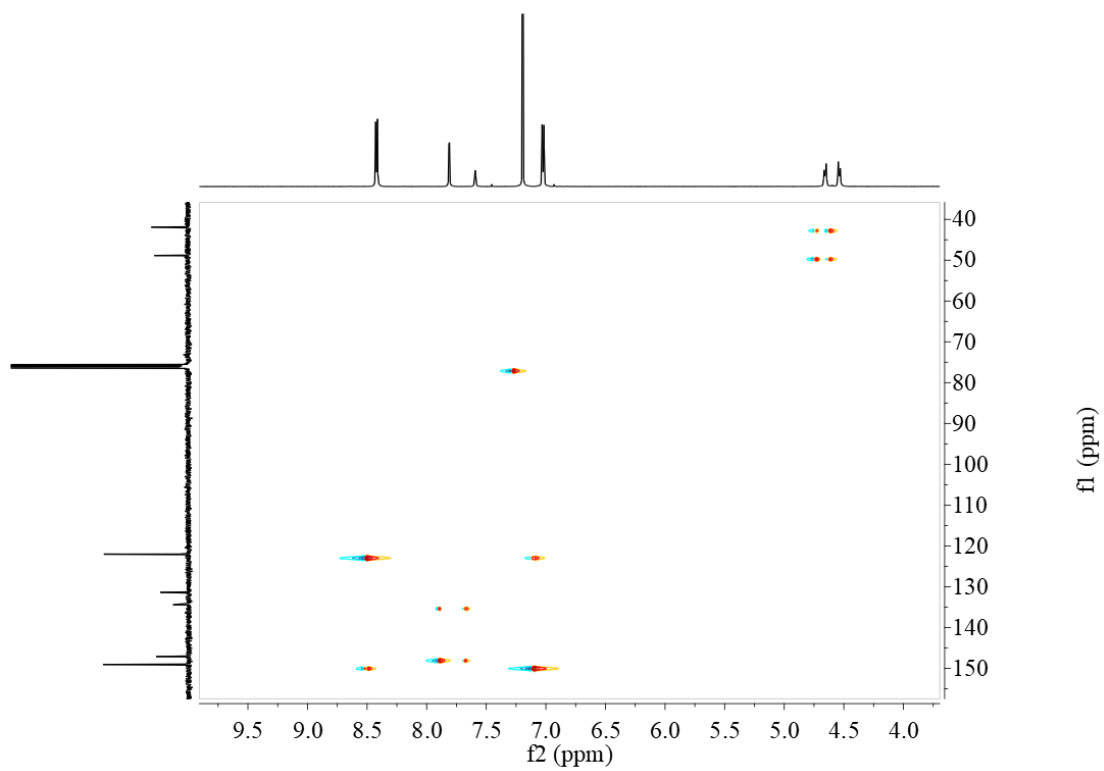

(d)

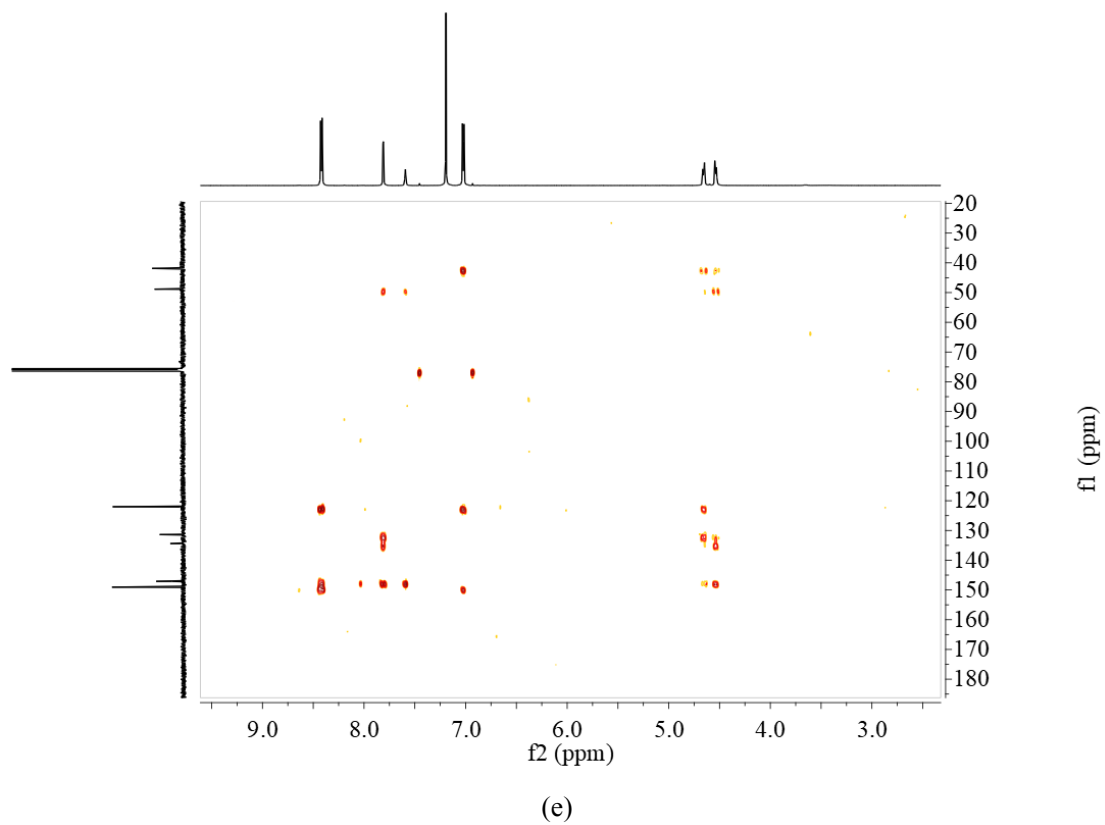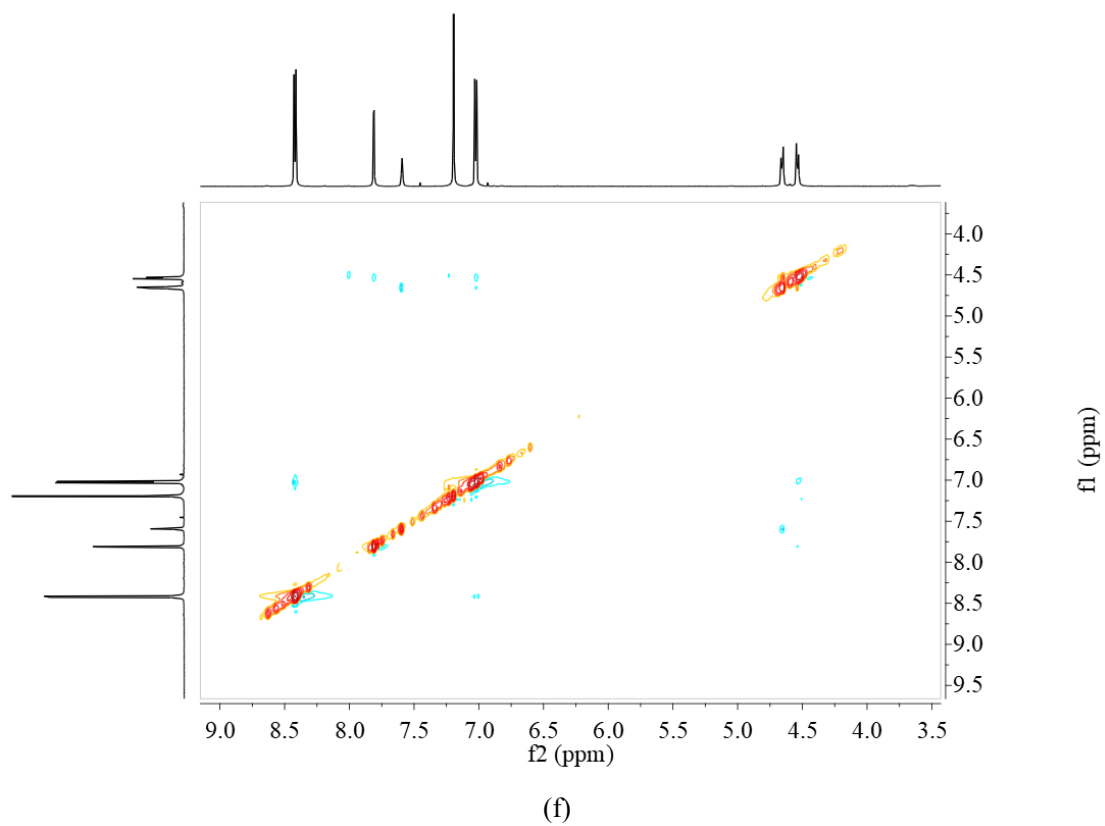

**Fig. S19** The  $^1\text{H}$  (a),  $^{13}\text{C}$  (b), H-H COSY (c), HSQC (d), HMBC (e), NOESY (f) NMR spectra of

**Isomer  $\alpha$**  in  $\text{CDCl}_3$ .



T: FTMS + p ESI sid=12.50 Full ms [370.00-900.00]

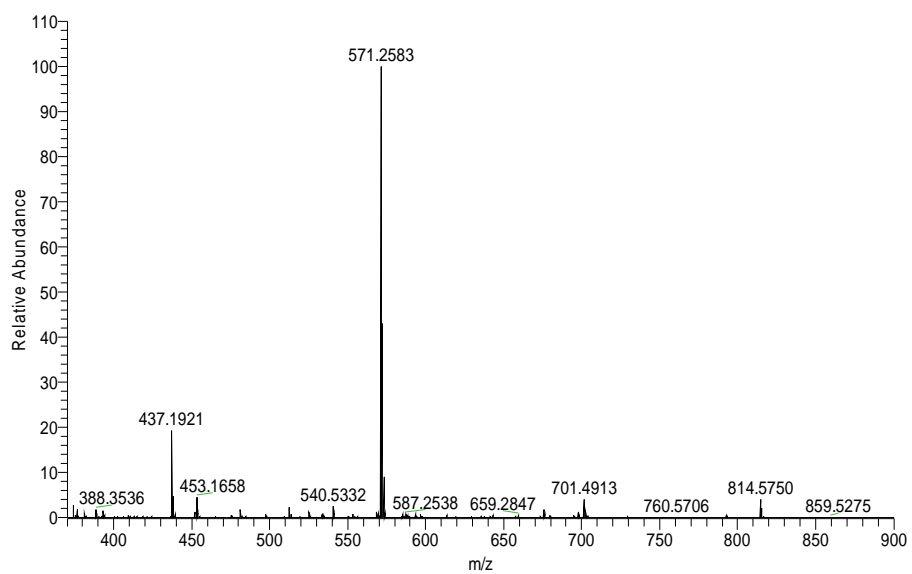

**Fig. S20** The mass spectrum of **Isomer  $\alpha$** .

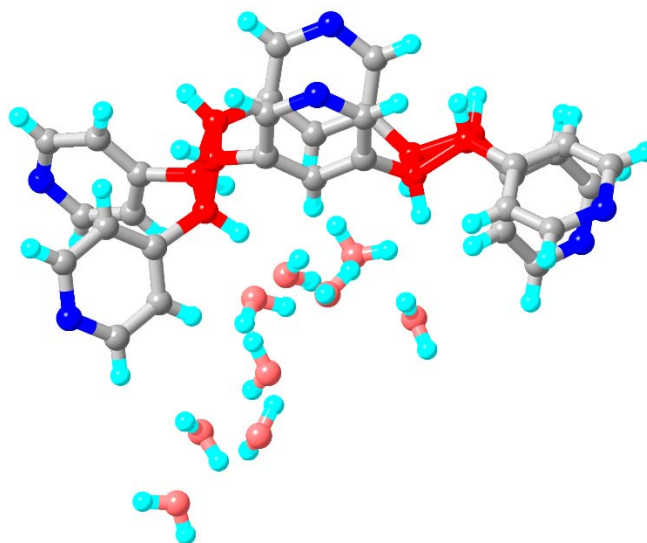

**Fig. S21** The crystal structure of **Isomer  $\beta$** .

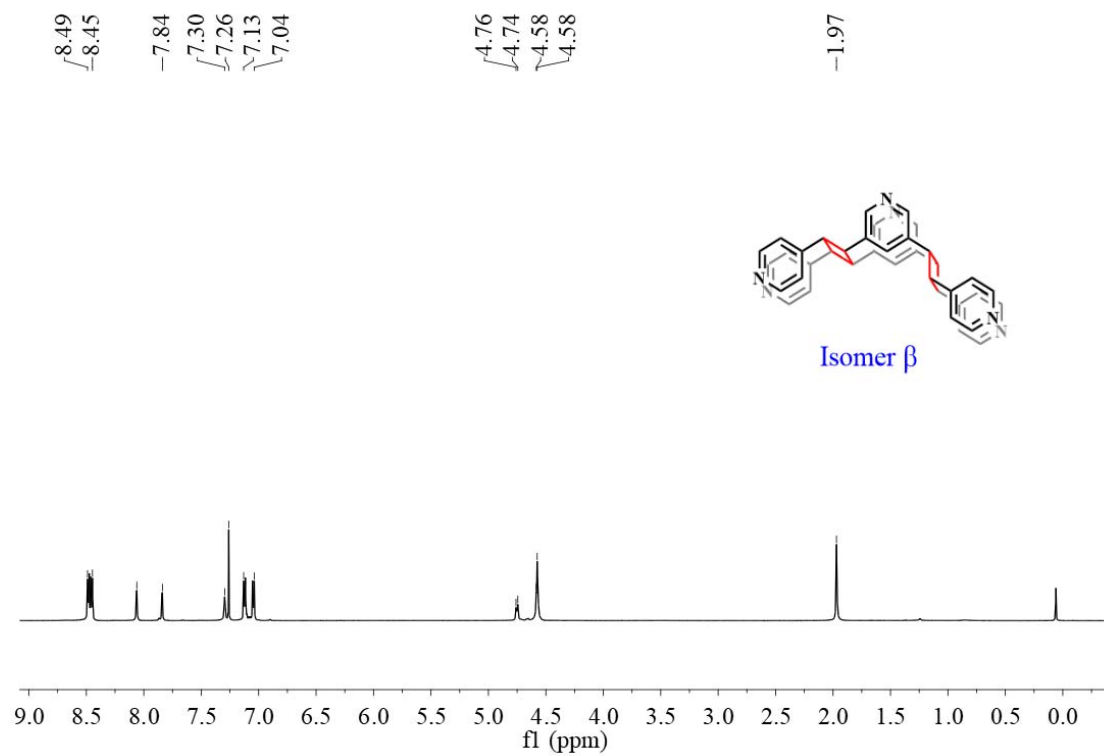

(a)

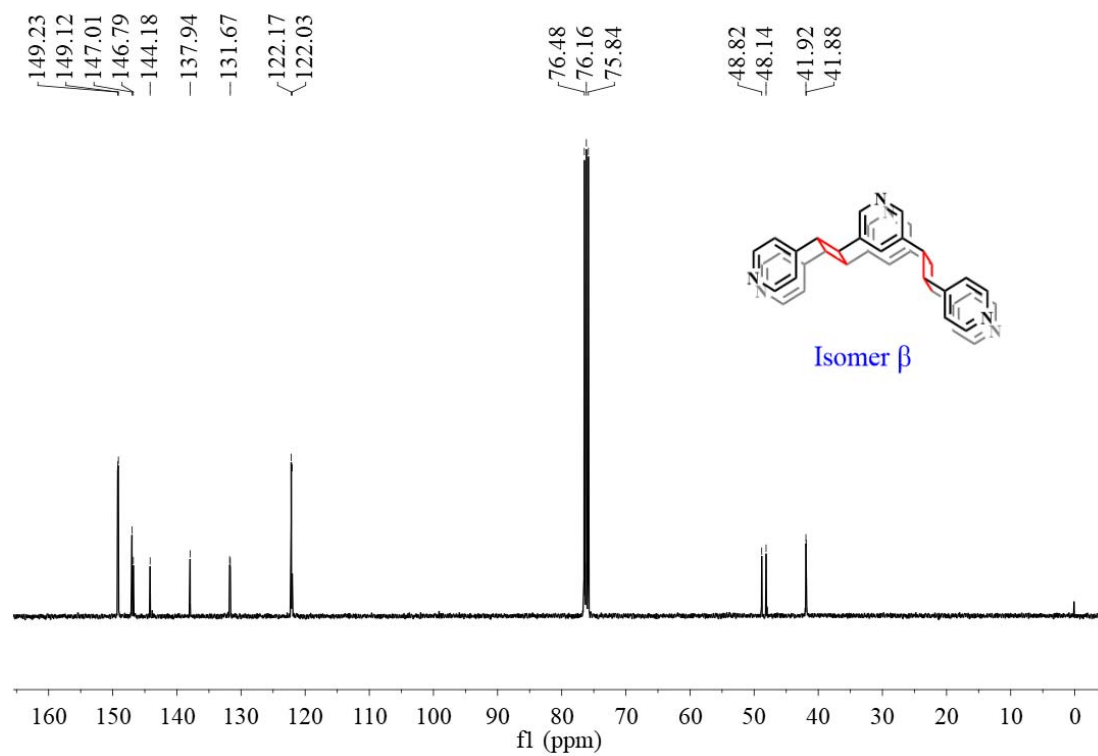

(b)

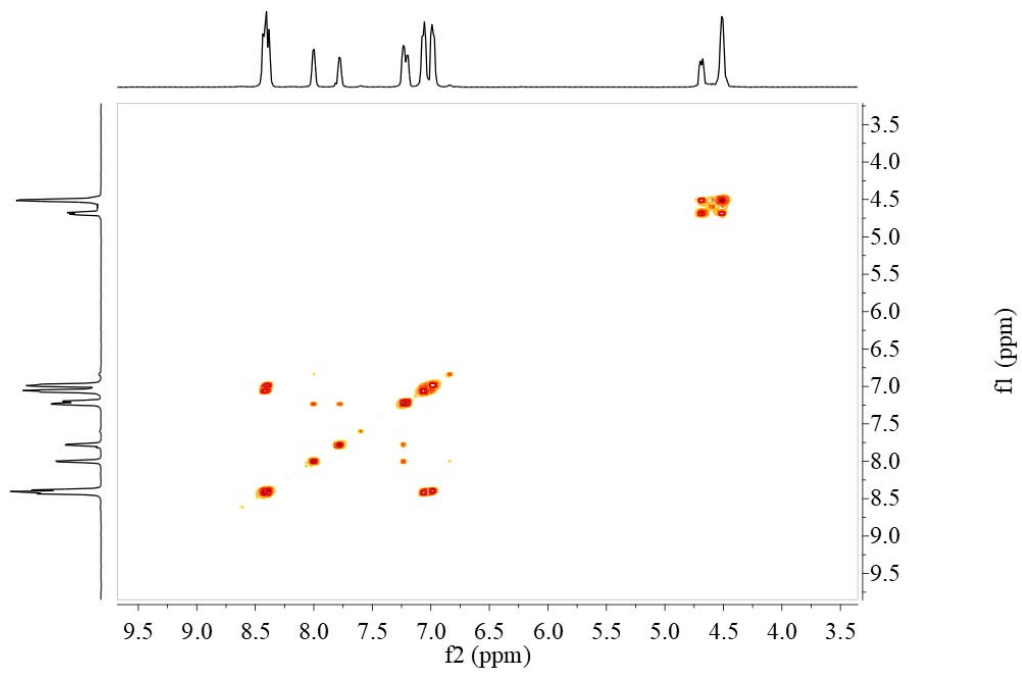

(c)

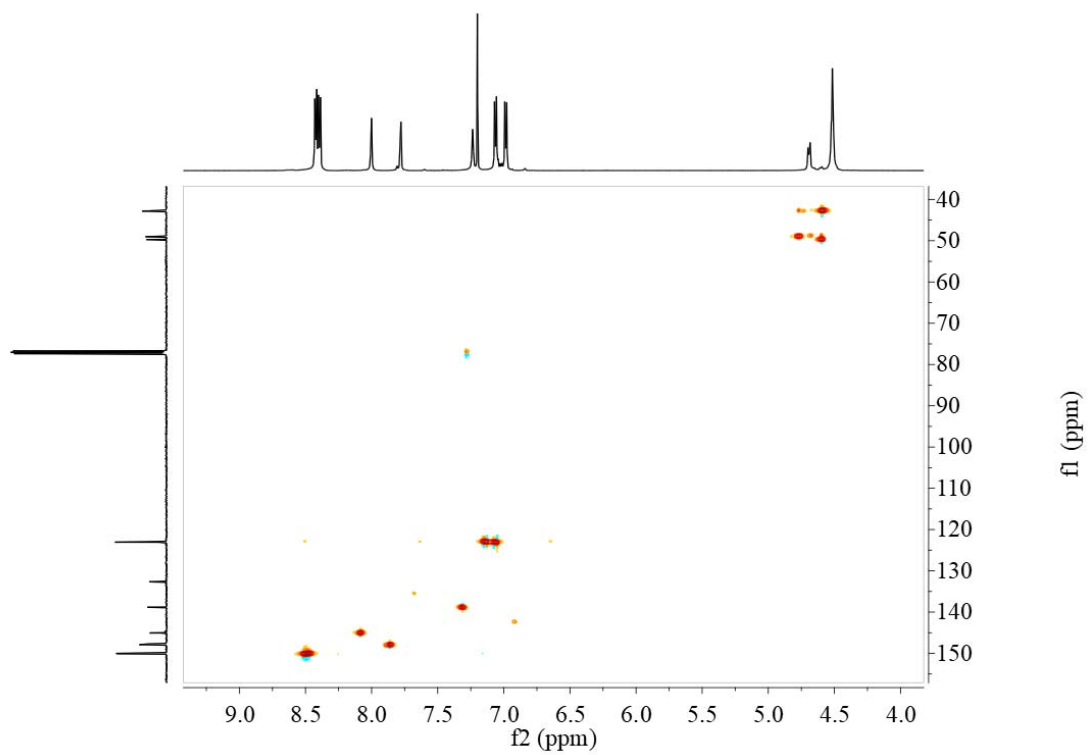

(d)

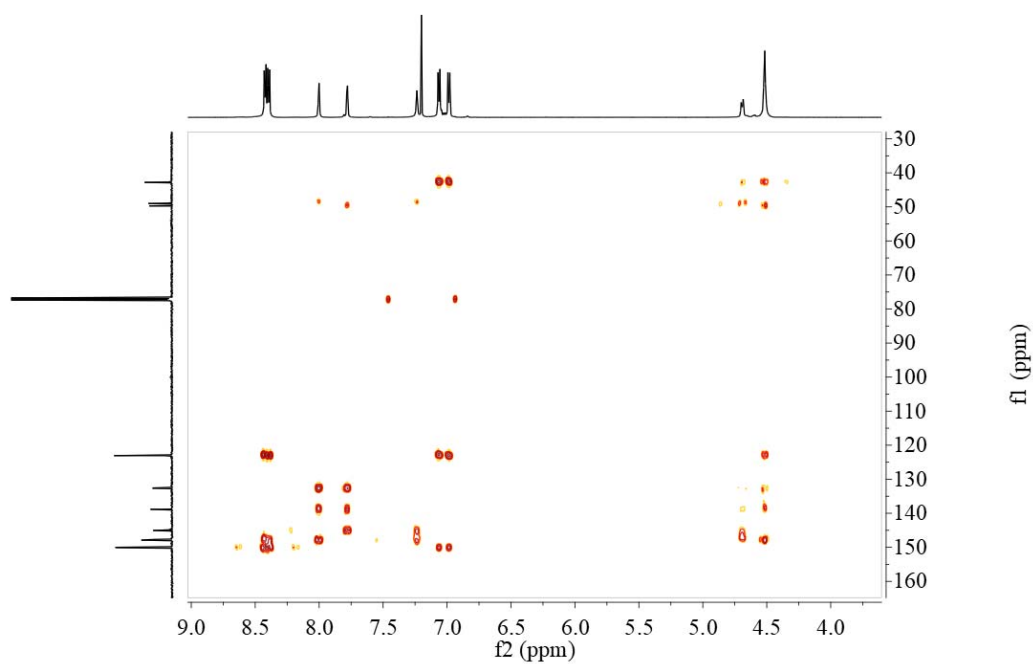

(e)

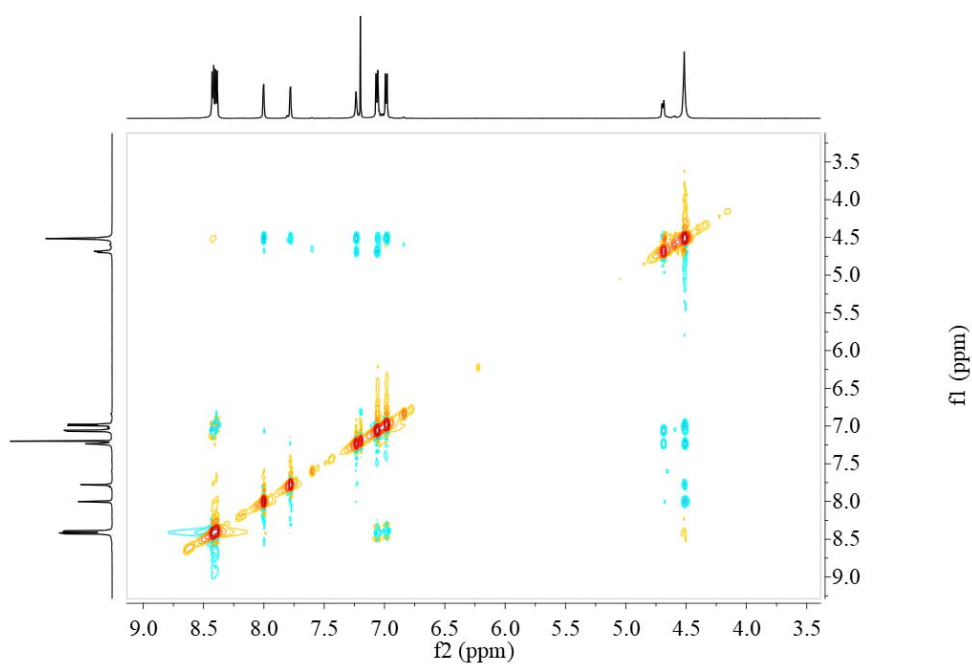

(f)

**Fig. S22** The  $^1\text{H}$  (a),  $^{13}\text{C}$  (b), H-H COSY (c), HSQC (d), HMBC (e), NOESY (f) NMR spectra of

**Isomer  $\beta$**  in  $\text{CDCl}_3$ .

H1-2 #2 RT: 0.01 AV: 1 NL: 1.88E7  
T: FTMS + p ESI Full ms [200.00-900.00]

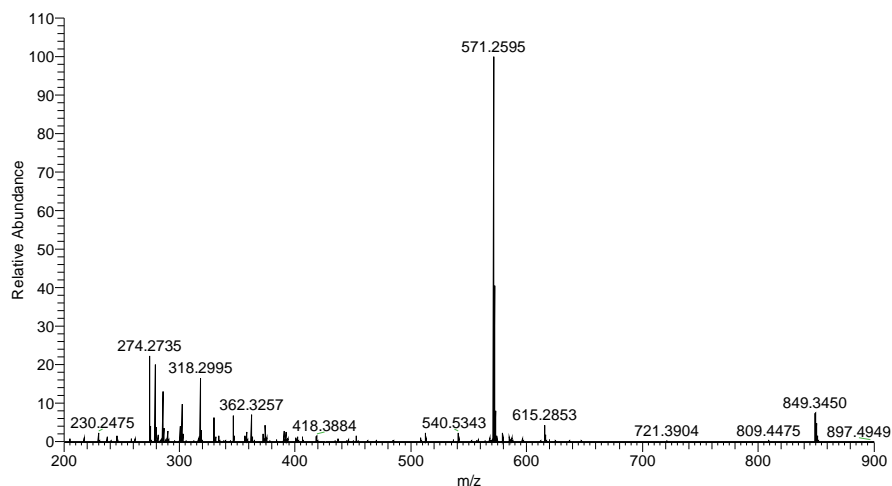

**Fig. S23** The mass spectrum of **Isomer  $\beta$** .

**Table S2** A summary of isomer ratios, number of guest molecules, dimensions of framework structures and dimensions of guest molecules in **CP<sub>1</sub>-CP<sub>3</sub>**

|                       | Number of guest molecules | Dimensions of guest molecules <sup>5</sup> | Dimensions of framework structures | Ratios of <b>Isomer <math>\alpha</math></b> to <b>Isomer <math>\beta</math></b> from irradiation of <b>CP<sub>1</sub></b> and <b>CP<sub>3</sub></b> |
|-----------------------|---------------------------|--------------------------------------------|------------------------------------|-----------------------------------------------------------------------------------------------------------------------------------------------------|
| <b>CP<sub>1</sub></b> | 14                        | 6.57 Å × 4.02 Å × 10.07 Å                  | 36.493 Å × 33.910 Å                | <b>Isomer <math>\alpha</math> : Isomer <math>\beta</math> = 0 : 1</b>                                                                               |
| <b>CP<sub>2</sub></b> | 14                        | 6.55 Å × 3.66 Å × 10.57 Å                  | 36.157 Å × 34.154 Å                | <b>Isomer <math>\alpha</math> : Isomer <math>\beta</math> = 3 : 7</b>                                                                               |
| <b>CP<sub>3</sub></b> | 14                        | 6.55 Å × 3.50 Å × 10.33 Å                  | 35.959 Å × 35.520 Å                | <b>Isomer <math>\alpha</math> : Isomer <math>\beta</math> = 1 : 1</b>                                                                               |

**Table S3** The relative Gibbs free energies (kcal/mol) for **Isomer  $\alpha$**  and **Isomer  $\beta$**

| Compound                                | <b>Isomer <math>\alpha</math></b> | <b>Isomer <math>\beta</math></b> |
|-----------------------------------------|-----------------------------------|----------------------------------|
| Relative Gibbs free energies (kcal/mol) | 0                                 | 0.94                             |

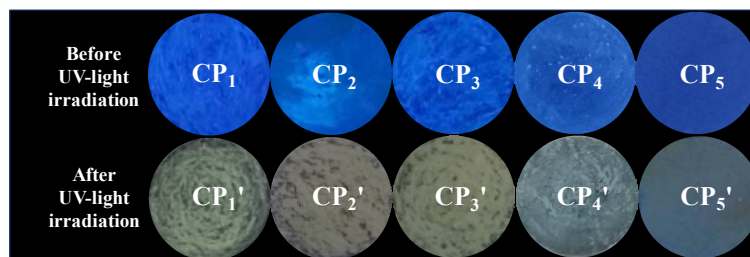

**Fig. S24** Photograph of filter papers impregnated with solution of CP<sub>1</sub>-CP<sub>5</sub> and CP<sub>1'</sub>-CP<sub>5'</sub> in DMF (365 nm).

## References

1. Y. X. Shi, F. L. Hu, W. H. Zhang and J. P. Lang, *CrystEngComm*, 2015, **17**, 9404-9412.
2. C. Lee, W. Yang and R. G. Parr, *Phys. Rev. B*, 1988, **37**, 785-789.
3. M. J. Frisch, G. W. Trucks, H. B. Schlegel, G. E. Scuseria, M. A. Robb, J. R. Cheeseman, G. Scalmani, V. Barone, B. Mennucci, G. A. Petersson, H. Nakatsuji, M. Caricato, X. Li, H. P. Hratchian, A. F. Izmaylov, J. Bloino, G. Zheng, J. L. Sonnenberg, M. Hada, M. Ehara, K. Toyota, R. Fukuda, J. Hasegawa, M. Ishida, T. Nakajima, Y. Honda, O. Kitao, H. Nakai, T. Vreven, J. A. Montgomery, Jr., J. E. Peralta, F. Ogliaro, M. Bearpark, J. J. Heyd, E. Brothers, K. N. Kudin, V. N. Staroverov, T. Keith, R. Kobayashi, J. Normand, K. Raghavachari, A. Rendell, J. C. Burant, S. S. Iyengar, J. Tomasi, M. Cossi, N. Rega, J. M. Millam, M. Klene, J. E. Knox, J. B. Cross, V. Bakken, C. Adamo, J. Jaramillo, R. Gomperts, R. E. Stratmann, O. Yazyev, A. J. Austin, R. Cammi, C. Pomelli, J. W. Ochterski, R. L. Martin, K. Morokuma, V. G. Zakrzewski, G. A. Voth, P. Salvador, J. J. Dannenberg, S. Dapprich, A. D. Daniels, O. Farkas, J. B. Foresman, J. V. Ortiz, J. Cioslowski and D. J. Fox, *Gaussian 09, Revision C.01*, Gaussian, Inc., Wallingford CT, 2010.
4. M. P. Andersson and P. Uvdal, *J. Phys. Chem. A*, 2005, **109**, 2937-2941.
5. M. Mantina, A. C. Chamberlin, R. Valero, C. J. Cramer and D. G. Truhlar, *J. Phys. Chem. A*, 2009, **113**, 5806-5812.
